# Supplementary material for: Sec22b is a critical and nonredundant regulator of plasma cell maintenance
Source: PubMed Central journal article supplement — Proc Natl Acad Sci U S A. 2023 Jan 3;120(2):e2213056120. doi: 10.1073/pnas.2213056120 (PMC9926242; doi:10.1073/pnas.2213056120), 2023-01-03
Supplement: pnas.2213056120.sapp.pdf [file pnas.2213056120.sapp.pdf]

1 **Supplementary Information**

2

3 **Sec22b is a critical and non-redundant regulator of plasma cell maintenance.**

4 Amélie Bonaud<sup>1,2,3</sup>, Laetitia Gargowitsch<sup>4</sup>, Simon M. Gilbert<sup>5</sup>, Elanchezhian Rajan<sup>6</sup>, Pablo Canales-  
5 Herrerias<sup>7</sup>, Daniel Stockholm<sup>8,9</sup>, Nabila F. Rahman<sup>10</sup>, Mark O. Collins<sup>6</sup>, Hakan Taskiran<sup>11,12,13</sup>, Danika  
6 L. Hill<sup>14,15</sup>, Andres Alloatti<sup>16,17</sup>, Nagham Alouche<sup>4</sup>, Stéphanie Balor<sup>18</sup>, Vanessa Soldan<sup>18</sup>, Daniel Gillet<sup>19</sup>,  
7 Julien Barbier<sup>19</sup>, Françoise Bachelier<sup>4</sup>, Kenneth G.C. Smith<sup>5,20</sup>, Julia Jellusova<sup>11,12</sup>, Pierre Bruhns<sup>7</sup>,  
8 Sebastian Amigorena<sup>16</sup>, Karl Balabanian<sup>1,2,3</sup>, Michelle A. Linterman<sup>14</sup>, Andrew A. Peden<sup>6</sup> and Marion  
9 Espéli<sup>1,2,3\*</sup>

10

11 *1- Université Paris-Cité, Institut de Recherche Saint-Louis, INSERM U1160, F-75010 Paris, France,*

12 *2- CNRS, GDR3697 “Microenvironment of tumor niches”, Micronit, France,*

13 *3- OPALE Carnot Institute, The Organization for Partnerships in Leukemia, Hôpital Saint-Louis, Paris,*  
14 *France*

15 *4- Université Paris-Saclay, INSERM, Inflammation, Microbiome and Immunosurveillance, Clamart,*  
16 *France.*

17 *5- Department of Medicine, University of Cambridge, Cambridge Biomedical Campus, Addenbrooke’s*  
18 *Hospital, Cambridge, UK.*

19 *6- School of Bioscience, University of Sheffield, Western Bank, Sheffield, S102TN, UK*

20 *7- Institut Pasteur, Université de Paris, Unit of Antibodies in Therapy and Pathology, Inserm UMR1222,*  
21 *F-75015 Paris*

22 *8- PSL Research University, EPHE, Paris, France*

23 *9- Sorbonne Université, INSERM, Centre de Recherche Saint-Antoine, CRSA, F-75012, Paris, France*

24 *10- Dementia Research Institute, University of Cardiff, Hadyn Ellis Building, Maindy Road, Cardiff,*  
25 *CF24 4HQ*

26 *11- Institute of Clinical Chemistry and Pathobiochemistry, School of Medicine, Klinikum rechts der*  
27 *Isar, Technical University of Munich, 81675 Munich, Germany*

28 *12- TranslaTUM, Center for Translational Cancer Research, Technical University of Munich, 81675*  
29 *Munich, Germany*

30 *13- Max Planck Institute of Immunobiology and Epigenetics, 79108 Freiburg im Breisgau, Germany*

31 *14- Lymphocyte Signalling and Development, Babraham Institute, Babraham Research Campus,*  
32 *Cambridge CB22 3AT, UK*

33 *15- Department of Immunology and Pathology, Monash University, Melbourne, Victoria, 3004,*  
34 *Australia*

35 *16- PSL Research University, Institut Curie Research Center, INSERM U932, Paris, France*

36 *17- Facultad de Ciencias Médicas, Instituto de Inmunología Clínica y Experimental de Rosario*  
37 *(IDICER)-CONICET/Universidad Nacional de Rosario, Rosario, Argentina.*

38 *18- METi, Centre de Biologie Intégrative, Université de Toulouse, CNRS, UPS, 31062, Toulouse,*  
39 *France*

40 *19- Université Paris-Saclay, CEA, INRAE, Département Médicaments et Technologies pour la Santé*  
41 *(DMTS), SIMoS, 91191 Gif-sur-Yvette, France*

42 *20- Cambridge Institute of Therapeutic Immunology & Infectious Disease, Jeffrey Cheah Biomedical*  
43 *Centre Cambridge Biomedical, University of Cambridge, Cambridge, United Kingdom*

44

45 *\* Corresponding author: marion.espeli@inserm.fr*

46

47 **Supplemental Information titles and legends:**  
48 **Supplementary methods for the proteomic studies and analyses**  
49 **Supplementary figure 1: Raw Label-Free Quantification intensity values for the indicated**  
50 **proteins measured by LC-MS/MS analysis**  
51 **Supplementary figure 2: Stx5 controls plasma cell maintenance and antibody secretion**  
52 **Supplementary figure 3: Characterization of the *Sec22b*<sup>B-KO</sup> mouse model**  
53 **Supplementary figure 4: Purity of the sorted samples for the RNAseq analysis**  
54 **Supplementary figure 5: Under-represented gene sets in *Sec22b*<sup>B-KO</sup> PCs**  
55 **Supplementary figure 6: Over-represented gene sets in *Sec22b*<sup>B-KO</sup> PCs**  
56 **Supplementary figure 7: PLAssay on *Sec22b*<sup>WT</sup> and *Sec22b*<sup>B-KO</sup> PCs**  
57 **Supplementary figure 8: Graphical abstract**  
58  
59 **Supplementary Table 1: 250 top downregulated genes in *Sec22b*<sup>B-KO</sup> PCs**  
60 **Supplementary table 2: 250 top upregulated genes in *Sec22b*<sup>B-KO</sup> PCs**  
61 **Supplementary table 3: List of antibodies used in flow cytometry, western blot and**  
62 **immunofluorescence**  
63 **Supplementary table 4: List of primers used for Biomark based qPCR**  
64

65 **Supplementary methods for the proteomics studies and analyses:**

66 To generate primary immune cells for proteomic studies, the spleens from healthy C57BL/6 mice, 8-10  
67 weeks of age, were crushed through a 40  $\mu$ M cell strainer into complete RPMI-1640 medium (50  $\mu$ M  $\beta$ -  
68 mercaptoethanol, 10% endotoxin-free Foetal Calf Serum, 2mM Penicillin-Streptomycin and L-  
69 Glutamine). Red blood cells were removed by lysis and naive B cells purified using a mouse B cell  
70 isolation kit following the manufacturer's instructions (Miltenyi Biotec; catalogue number 130-090-  
71 862). To generate antibody secreting cells, B-cells were incubated with 10 $\mu$ g/ml lipopolysaccharide  
72 (Sigma) for 3 days. The differentiated cells were enriched using anti-CD138 antibodies coupled to PE  
73 and anti-PE magnetic beads (Miltenyi Biotec; catalogue number 130-048-801). This approach generated  
74 cells which were significantly enriched in markers of differentiation such as spliced Xbp1, MIST1 and  
75 intracellular IgM (~80% purity based on immunostaining).

76

77 For quantitative mass spectrometry analysis, purified cells from four biological repeats were lysed into  
78 FASP buffer and the protein concentrations determined using a BCA assay (Pierce). The protein  
79 concentration of the samples was normalised, digested using the FASP method (1) using trypsin and  
80 100  $\mu$ g was fractionated into 36 fractions by high pH reverse phase chromatography, pooled into 12  
81 fractions and peptides were analysed using LC-MS/MS on an Orbitrap Elite (Thermo Fisher) hybrid  
82 mass spectrometer equipped with a nanospray source, coupled with an Ultimate RSLCnano LC System  
83 (Dionex). The system was controlled by Xcalibur 2.1 (Thermo Fisher). Peptides were desalted on-line  
84 using a micro-Precolumn cartridge (C18 Pepmap 100, LC Packings) and then separated using a 120 min  
85 RP gradient (4-32% acetonitrile/0.1% formic acid) on an Easy-Spray™ PepMap™ column (50 cm x 75  
86  $\mu$ m ID, PepMap C18, 2  $\mu$ m particles (Thermo)). The instrument was operated with a cycle of one MS  
87 (in the Orbitrap) acquired at a resolution of 60,000 at m/z 400, with the top 20 most abundant multiply-  
88 charged (2+ and higher) ions in a given chromatographic window subjected to MS/MS fragmentation  
89 in the linear ion trap. An FTMS target values of 1e6 and an ion trap MSn target value of 1e4 was used  
90 and with the lock mass (445.120025) enabled. Maximum FTMS scan accumulation time of 200 ms and  
91 maximum ion trap MSn scan accumulation time of 50 ms were used. Dynamic exclusion was enabled  
92 with a repeat duration of 45s with an exclusion list of 500 and exclusion duration of 30s.

93  
94  
95  
96  
97  
98  
99  
100  
101  
102  
103  
104  
105  
106  
107  
108  
109  
110  
111  
112  
113  
114  
115  
116  
117  
118  
119

MS data was analysed using MaxQuant (2) version 1.5.8.3. Data was searched against mouse UniProt sequence databases (downloaded June 2015) using the following search parameters: trypsin with a maximum of 2 missed cleavages, 7 ppm for MS mass tolerance, 0.5 Da for MS/MS mass tolerance, with Acetyl (Protein N-term) and Oxidation (M) set as variable modifications and carbamidomethyl (C) as a fixed modification. A protein FDR of 0.01 and a peptide FDR of 0.01 were used for identification level cut offs. Label free quantification (LFQ) was performed using MaxQuant and data filtering and normalisation was performed using Perseus (3). Differential expression of RNA-Seq and proteomics data were computed separately using limma package in R and adjusted for multiple testing using Benjamini-Hochberg method. Genes or proteins with statistically significant differential expression (adjusted  $p < 0.05$ ) in each study were marked with an asterisk. Raw p-values from these differential expression analyses were then combined using the adaptively weighted (AW) method provided in the MetaDE R package and then corrected for false discovery rate. Corrected AW p-values less than 0.05 indicated statistically significant differential expression across studies.

120 Supplementary figure 1: Raw Label-Free Quantification intensity values for the indicated  
121 proteins measured by LC-MS/MS analysis

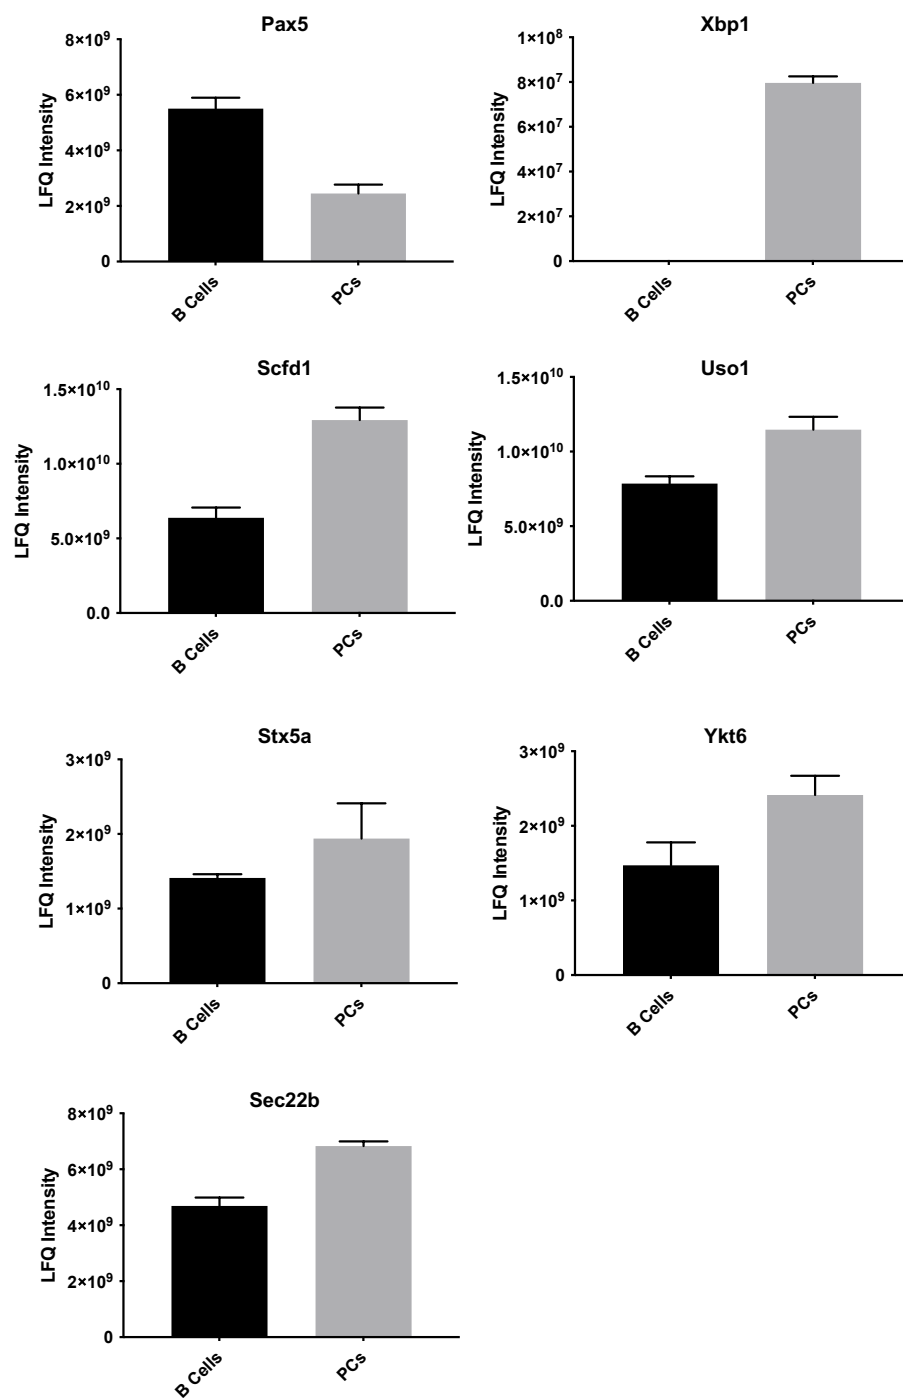

122  
123 To identify proteins that exhibit altered abundance when Naive B cells differentiate into PCs, we  
124 performed label-free mass spectrometry analysis of tryptic digests of proteins isolated from splenic B  
125 cells and *in vitro* differentiated PCs (CD138 enriched). Error bars show SEM for four biological repeats.  
126

127 **Supplementary figure 2: Stx5 controls plasma cell maintenance and antibody secretion**

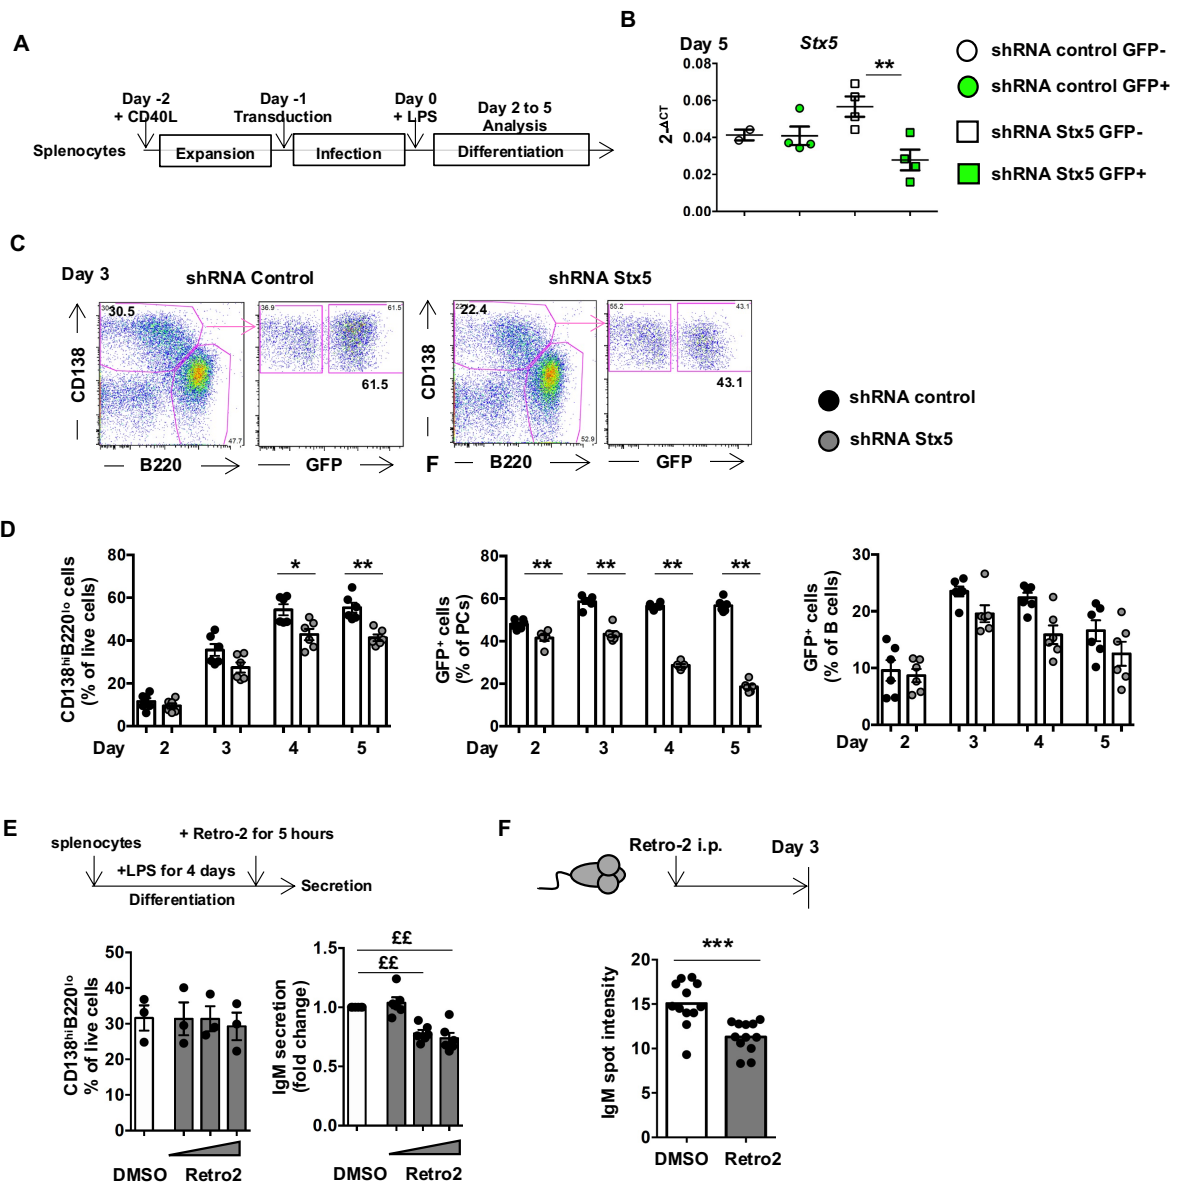

128

129 A) Schematic representation of the *in vitro* cell culture, transduction and differentiation assay.

130 B) Primary splenocytes were transduced with a vector encoding a control shRNA or with the vector  
 131 encoding *Stx5* specific shRNA together with a GFP reporter. *Stx5* expression was quantified by qPCR  
 132 in sorted GFP- and GFP+ cells from both experimental groups at day 5 after LPS stimulation. Data are  
 133 representative of 2 independent experiments. Statistical analysis was performed with the Mann-Whitney  
 134 non-parametric two-tailed unpaired test.

135 C-D) Representative dot plots showing the frequency of PCs (gated as CD138<sup>hi</sup>CD19<sup>lo</sup>) generated at day  
 136 3 (C) and the frequency of total PCs (D left), GFP<sup>+</sup> PCs (D middle) and GFP<sup>+</sup> B cells (D right) after

137 transduction with a control vector or with a vector encoding for a Stx5 specific shRNA at day 2, 3, 4  
138 and 5 after transduction. N= 6 independent experiments.

139 E) Schematic representation of the *in vitro* cell culture and treatment with Retro-2 (top), frequency of  
140 PCs (CD138<sup>+</sup>B220<sup>low</sup>) determined by flow cytometry (bottom left) and ELISA quantification of secreted  
141 IgM in the culture supernatant (bottom right, the fold change to DMSO is shown) after 5hours of  
142 incubation with increasing doses of Retro-2 (0.3, 3 and 30 $\mu$ M) of *in vitro* differentiated PCs. Two  
143 independent experiments were pooled for the ELISA (n=6) and one representative experiment is shown  
144 for the flow cytometry.

145 F) Schematic representation of the Retro-2 *in vivo* treatment (top), quantification of the intensity of IgM  
146 secretion by antibody forming cells (bottom) from the BM of mice injected with DMSO or with Retro-  
147 2 (80mg/kg) 3 days before. Two independent experiments were pooled, n=12 mice per group.

148 The p-values were determined with the two-tailed Mann-Whitney non-parametric test (\* $p < 0.05$ ;  
149 \*\* $p < 0.01$ ; \*\*\* $p < 0.001$ ), or with the 2way ANOVA with Sidak correction for multiple comparisons (~~££~~  
150  $p < 0.01$ ).

151

152

153 **Supplementary Figure 3: Characterization of the *Sec22b*<sup>B-KO</sup> mouse model**

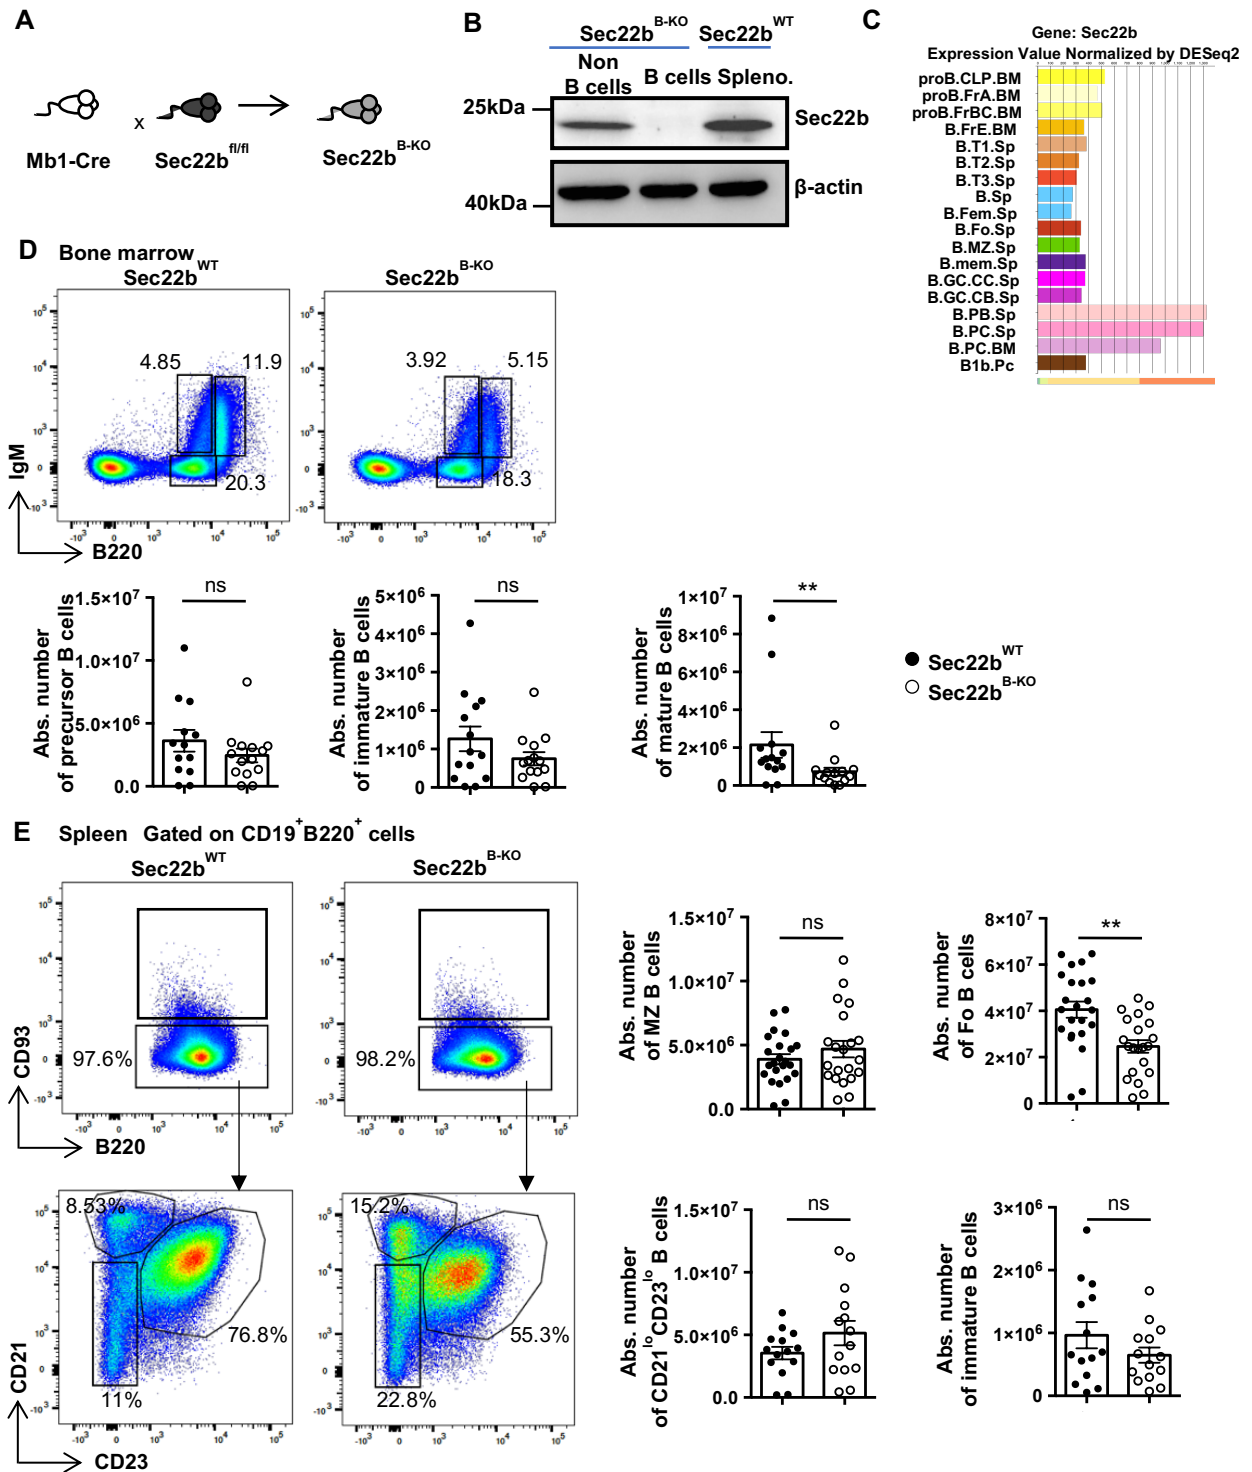

154

155 A) The *Sec22b*<sup>B-KO</sup> mouse model was generated by crossing mb1-Cre mice with *Sec22b*<sup>fl/fl</sup> mice, to  
 156 obtain mice heterozygous for Cre recombinase and homozygous for *Sec22b*<sup>fl/fl</sup> (referred to as *Sec22b*<sup>B-</sup>  
 157 <sup>KO</sup>) to have a specific deletion of this SNARE protein in the B cell lineage.



158 B) Western blot analysis of Sec22b (top) and  $\beta$ -actin (bottom) from non-B cells or B cells isolated from  
159 Sec22b<sup>B-KO</sup> mice and total splenocytes from Sec22b<sup>WT</sup> mice.

160 C) *Sec22b* expression across B cell differentiation determined through the Immgen Skyline website  
161 (<http://rstats.immgen.org/Skyline/skyline.html>). BM = Bone marrow, Sp = Spleen, Pc = Peritoneal  
162 cavity. CLP = common lymphoid progenitor, Fr = fraction, Fem = female, Fo = follicular, MZ =  
163 marginal zone, mem = memory, GC = germinal centre, CC = centrocyte, CB = centroblast, PB =  
164 plasmablast, PC= plasma cell.

165 D) Representative dot plots (top) and absolute number (bottom) of BM precursor B cells (B220<sup>low</sup>IgM<sup>-</sup>  
166 ), immature B cells (B220<sup>low</sup>IgM<sup>+</sup>) and mature B cells (B220<sup>+</sup>IgM<sup>+</sup>) in Sec22b<sup>WT</sup> and Sec22b<sup>B-KO</sup> mice.

167 E) Representative dot plots (left) and absolute number (right) of immature B cells (B220<sup>+</sup>CD19<sup>+</sup>CD93<sup>+</sup>),  
168 follicular B cells (B220<sup>+</sup>CD19<sup>+</sup>CD93<sup>-</sup>CD21<sup>+</sup>CD23<sup>+</sup>), marginal zone B cells (B220<sup>+</sup>CD19<sup>+</sup>CD93<sup>-</sup>CD21<sup>-</sup>  
169 CD23<sup>high</sup>) and CD21<sup>-</sup>CD23<sup>-</sup> B cells (B220<sup>+</sup>CD19<sup>+</sup>CD93<sup>-</sup>CD21<sup>-</sup>CD23<sup>-</sup>) in Sec22b<sup>WT</sup> and Sec22b<sup>B-KO</sup>  
170 mice.

171 For flow cytometry experiment cells were first gated on their size and structure, their viability and  
172 doublets were excluded. n=13-23 mice from 4-5 independent experiments. The p-values were  
173 determined with the two-tailed Mann-Whitney non-parametric test. \*\* $p < 0.01$ . “ns” = non-significant  
174  $p$ -value.

175

176

177 **Supplementary Figure 4: Cell sorting purity for RNAseq analysis**

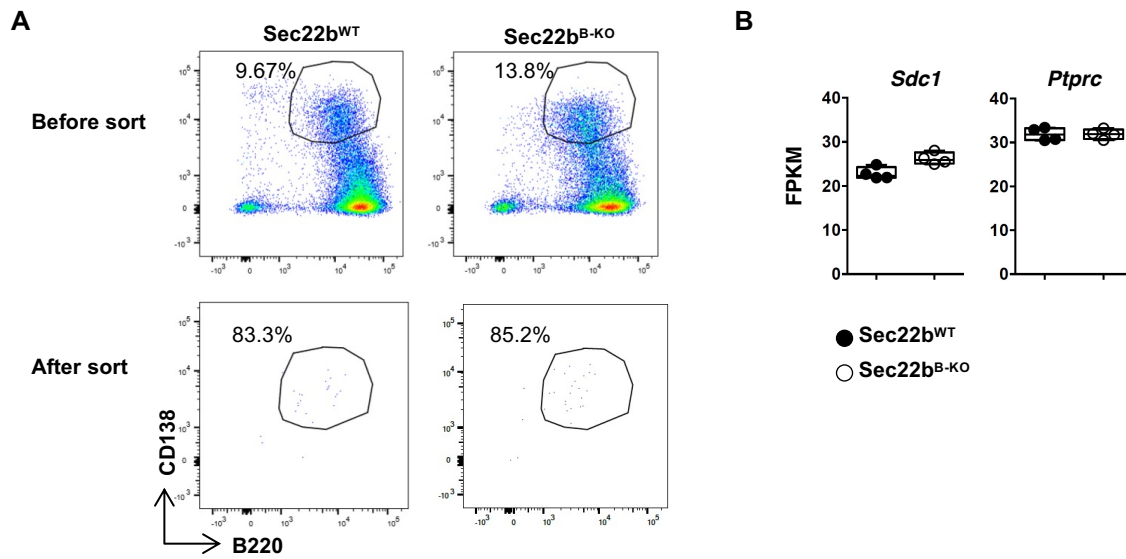

178

179 A) Representative dot plots of *in vitro* generated PC (B220<sup>+</sup>CD138<sup>+</sup>) after 2 days of LPS stimulation,  
180 before (top) and after (bottom) cell sorting. Cells were first gated on their size and structure, then on  
181 their viability and doublets were excluded. Purity was above 80% for all samples used for RNAseq  
182 analysis.

183 B) Expression of *Sdc1* and *Ptprc* in fragments per kilobase of exon per million reads mapped (FPKM)  
184 determined by RNAseq in PC from Sec22b<sup>WT</sup> and Sec22b<sup>B-KO</sup> mice

185

186 **Supplementary Figure 5: Under-represented gene sets in Sec22b<sup>B-KO</sup> PCs**

**GSEA - Under-expressed pathways Sec22b<sup>B-KO</sup> vs Sec22b<sup>WT</sup> PCs day2**

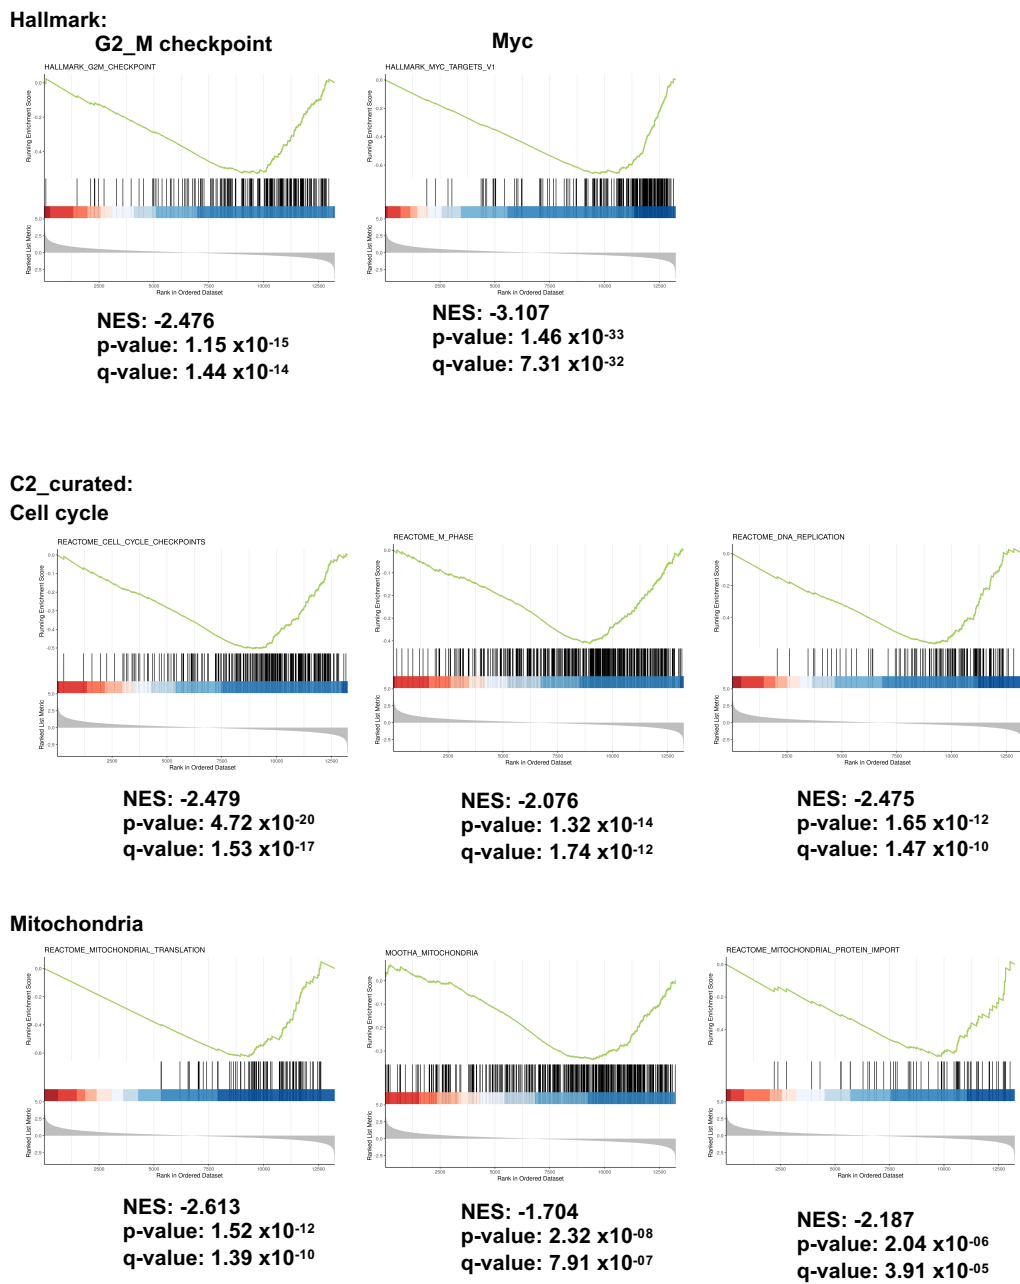

187

188 Gene set enrichment analyses were performed using the Hallmark and the C2\_curated MSigDB on  
 189 RNAseq data obtained from *in vitro* generated Sec22b<sup>WT</sup> and Sec22b<sup>B-KO</sup> PCs. NES, p-values and q-  
 190 values for each selected gene set are shown.

191

192

193 **Supplementary Figure 6: Over-represented gene sets in Sec22b<sup>B-KO</sup> PCs**

**GSEA - Over-expressed pathways Sec22b<sup>B-KO</sup> vs Sec22b<sup>WT</sup> PCs day2**

**Hallmark:**

**Hallmark\_protein secretion**

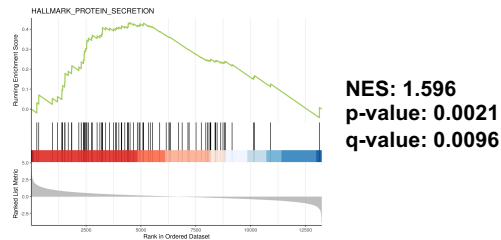

**C2\_curated:**

**ER-Golgi transport**

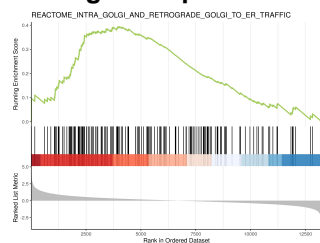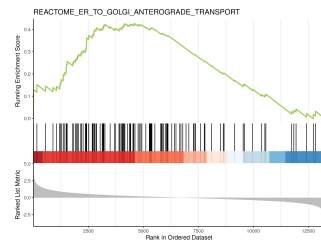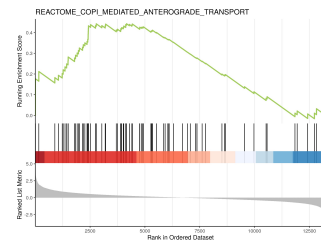

**UPR**

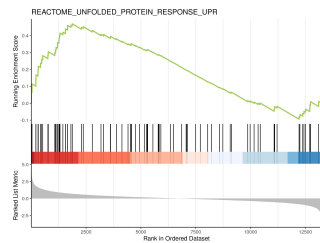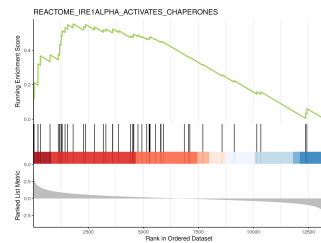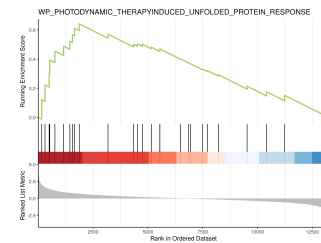

194

195 Gene set enrichment analyses were performed using the Hallmark and the C2\_curated MSigDB on

196 RNAseq data obtained from *in vitro* generated Sec22b<sup>WT</sup> and Sec22b<sup>B-KO</sup> PCs. NES, p-values and q-

197 values for each selected gene set are shown.

198

199 **Supplementary Figure 7: PLAssay on Sec22bWT and Sec22bB-KO PCs**

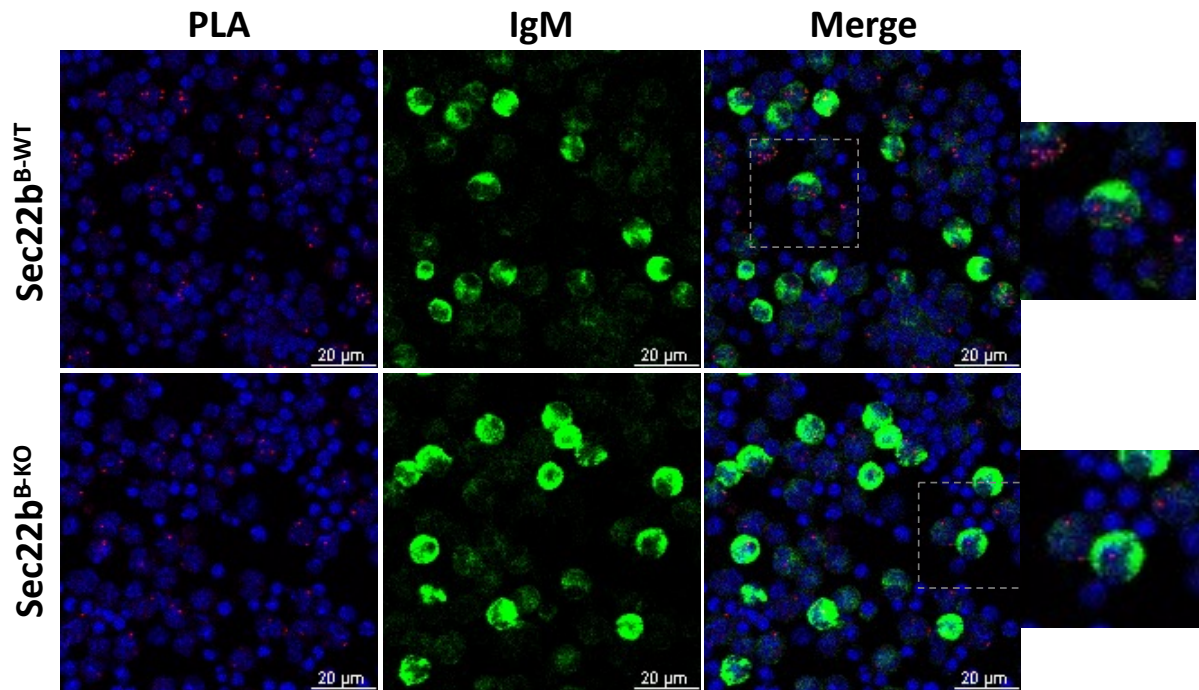

200

201 PLA performed on splenocytes stimulated 2 days with LPS. Cells are stained with anti-IgM (green),

202 PLA (red dot) and nuclei are counterstained with DAPI. Scale bar = 20μm

203

204

205 **Supplementary Figure 8: Graphical abstract**

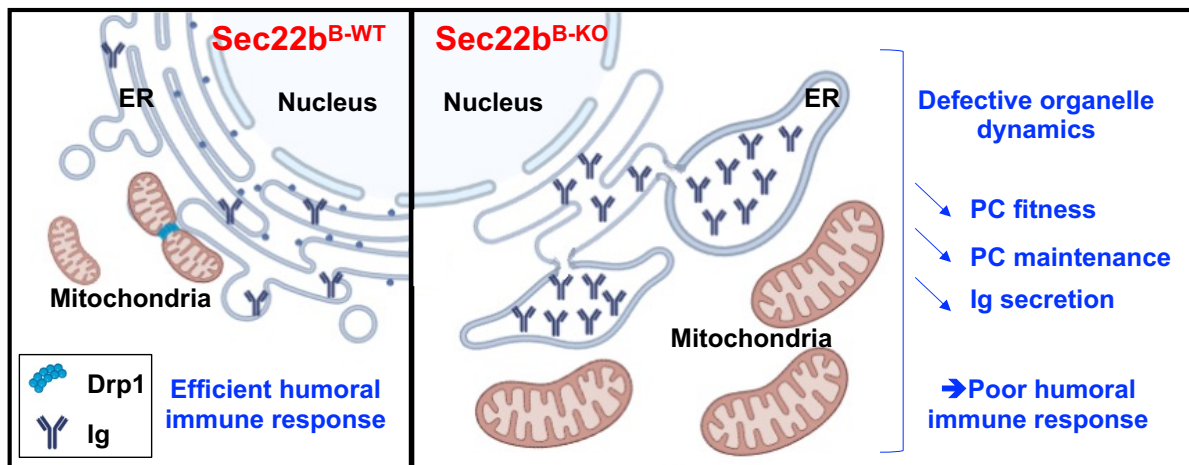

206

207 Sec22b deficiency in plasma cells leads to disrupted ER architecture and altered mitochondrial  
208 morphology and function. Mechanistically this might be caused by a decreased expression of the Drp1  
209 pro-fission molecule and by altered ER-mitochondria contact sites. These organelle defects translate  
210 into poor fitness of plasma cell, increased cell death and decreased immunoglobulin (Ig) secretion  
211 eventually causing a deficient humoral immune response.

212  
213  
214  
215  
216  
217  
218  
219  
220  
221  
222  
223  
224  
225  
226  
227  
228  
229  
230  
231  
232  
233  
234  
235

**Supplementary Table 1: 250 top down regulated genes in Sec22b<sup>B-KO</sup> PCs**

| Gene_Name | FPKM.WT    | FPKM.KO    | log2FC     | pval       | qval       |
|-----------|------------|------------|------------|------------|------------|
| Lss       | 8.56825401 | 2.87268283 | -1.4610023 | 1.2401E-11 | 2.4849E-08 |
| Hmgcs1    | 41.2146298 | 12.6431927 | -1.5902623 | 2.8482E-11 | 4.4387E-08 |
| Pcyt2     | 17.3690417 | 6.36857043 | -1.3325615 | 4.7844E-11 | 6.1005E-08 |
| Fads2     | 18.975706  | 4.07152798 | -2.1062392 | 7.3186E-11 | 7.1963E-08 |
| Cyp51     | 54.3406074 | 22.3476327 | -1.1708981 | 1.7684E-10 | 1.2148E-07 |
| Ldlr      | 8.6795728  | 2.45855603 | -1.7101444 | 1.848E-10  | 1.2148E-07 |
| Msmo1     | 17.6524776 | 7.96792128 | -1.0359432 | 4.365E-10  | 1.776E-07  |
| Acat2     | 20.2603535 | 6.05876713 | -1.6241873 | 8.620E-10  | 2.4677E-07 |
| Elovl6    | 6.36330644 | 2.17111917 | -1.4369985 | 1.3888E-09 | 3.12E-07   |
| Idi1      | 21.3717499 | 6.88668479 | -1.5268591 | 1.4014E-09 | 3.12E-07   |
| Sqle      | 31.146447  | 13.5704273 | -1.0905489 | 2.4411E-09 | 4.4784E-07 |
| Insig1    | 110.251597 | 47.5404861 | -1.0995955 | 3.1548E-09 | 5.2677E-07 |
| Dhcr24    | 28.7478759 | 10.3330917 | -1.37764   | 3.6204E-09 | 5.7705E-07 |
| Ldha      | 393.592265 | 110.980637 | -1.7369734 | 4.7344E-09 | 6.9172E-07 |
| Stard4    | 15.137827  | 6.81370915 | -1.0386323 | 4.8045E-09 | 6.9472E-07 |
| Fgfr1op   | 10.6784262 | 4.5618304  | -1.1096151 | 5.5479E-09 | 7.6996E-07 |
| Surf2     | 8.50161825 | 2.68843094 | -1.5323306 | 5.5993E-09 | 7.6996E-07 |
| Pgam1     | 65.6613951 | 22.2532633 | -1.4543746 | 5.7267E-09 | 7.7984E-07 |
| Echdc1    | 6.67061053 | 2.93570996 | -1.0688897 | 6.3202E-09 | 8.1328E-07 |
| Acsl3     | 16.7045304 | 7.92516022 | -0.9659895 | 7.6698E-09 | 9.3545E-07 |
| Apex1     | 74.6628606 | 20.6199279 | -1.7413501 | 8.681E-09  | 1.0063E-06 |
| Icam1     | 17.0459618 | 8.80207691 | -0.8387712 | 8.6538E-09 | 1.0063E-06 |
| Tspan15   | 1.49383694 | 0.56831499 | -1.2785364 | 8.6057E-09 | 1.0063E-06 |
| Dhcr7     | 10.0545011 | 5.24343935 | -0.8279307 | 9.9074E-09 | 1.0689E-06 |
| Flt3      | 5.55192425 | 2.21661128 | -1.2069847 | 1.068E-08  | 1.1263E-06 |
| Nsdhl     | 12.8649607 | 5.88050199 | -1.0157331 | 1.1325E-08 | 1.1488E-06 |
| Pfkl      | 25.384259  | 8.81633904 | -1.4231302 | 1.4375E-08 | 1.3441E-06 |
| Scd1      | 166.079584 | 41.6559021 | -1.915811  | 1.5057E-08 | 1.3894E-06 |
| Scarb1    | 5.03172711 | 1.96359529 | -1.2493531 | 1.5385E-08 | 1.4012E-06 |
| Ddx27     | 24.8941261 | 11.8483318 | -0.9581696 | 1.7316E-08 | 1.4719E-06 |
| Ppid      | 26.6879301 | 8.13557211 | -1.6169173 | 1.8425E-08 | 1.5305E-06 |
| Cdk5r1    | 2.41313742 | 0.59678053 | -1.88986   | 1.9854E-08 | 1.6004E-06 |
| Zbtb32    | 40.5827888 | 9.75916102 | -1.9572858 | 2.0842E-08 | 1.6246E-06 |
| Fkbp3     | 12.5446757 | 5.0815353  | -1.1991922 | 2.3398E-08 | 1.7402E-06 |
| Nat10     | 14.2840458 | 5.34668556 | -1.3062485 | 2.3599E-08 | 1.7421E-06 |
| Lmo2      | 40.6125984 | 18.1293906 | -1.0471981 | 2.4732E-08 | 1.7881E-06 |
| Mybl2     | 27.223812  | 10.9252737 | -1.2175914 | 2.817E-08  | 1.9657E-06 |
| Nop16     | 40.6356111 | 16.1184395 | -1.2174837 | 2.9784E-08 | 2.0378E-06 |
| Me2       | 14.3727844 | 7.51554974 | -0.8264695 | 3.0655E-08 | 2.0771E-06 |
| Scd2      | 164.307299 | 48.1071414 | -1.6662771 | 3.1507E-08 | 2.1136E-06 |
| Fus       | 25.2588217 | 11.6070257 | -1.0150247 | 3.1906E-08 | 2.1168E-06 |
| Ncl       | 203.823949 | 84.5942881 | -1.1613783 | 3.3513E-08 | 2.1834E-06 |

|               |            |            |            |            |            |
|---------------|------------|------------|------------|------------|------------|
| Ppp5c         | 51.9729276 | 19.3188383 | -1.3238802 | 3.3693E-08 | 2.1834E-06 |
| Utp14b        | 2.739302   | 1.08058333 | -1.2263403 | 3.385E-08  | 2.1834E-06 |
| Fads1         | 16.4869904 | 8.97447958 | -0.7637741 | 3.4572E-08 | 2.1855E-06 |
| Pkm           | 399.846769 | 179.465117 | -1.0529468 | 3.4523E-08 | 2.1855E-06 |
| H4c9          | 38.700964  | 16.0462497 | -1.159767  | 3.5035E-08 | 2.1938E-06 |
| Prpf38b       | 16.258093  | 9.46884088 | -0.666817  | 3.5443E-08 | 2.1996E-06 |
| Inf2          | 15.493966  | 7.71312821 | -0.8916687 | 3.7129E-08 | 2.2642E-06 |
| Aprt          | 71.9016379 | 30.6749538 | -1.1176302 | 3.7628E-08 | 2.2847E-06 |
| Eno1          | 186.949881 | 57.476436  | -1.6227098 | 3.8733E-08 | 2.3316E-06 |
| Eno1b         | 4.77195102 | 1.35046988 | -1.7096304 | 3.9072E-08 | 2.342E-06  |
| Lonp1         | 32.4179483 | 17.0426778 | -0.8191799 | 4.0741E-08 | 2.3909E-06 |
| Aacs          | 13.4064779 | 7.4780055  | -0.7286582 | 4.4211E-08 | 2.4985E-06 |
| Grwd1         | 34.4037728 | 10.5583496 | -1.5913526 | 4.4252E-08 | 2.4985E-06 |
| Thop1         | 17.1790871 | 5.68553403 | -1.4923155 | 4.4494E-08 | 2.4985E-06 |
| Tpi1          | 200.078735 | 63.9924785 | -1.5531212 | 4.4806E-08 | 2.5038E-06 |
| Lipg          | 1.11282125 | 0.23394749 | -2.1181924 | 4.6902E-08 | 2.5959E-06 |
| Rpp40         | 1.7478984  | 0.66677602 | -1.2753635 | 4.7439E-08 | 2.6093E-06 |
| Znhit6        | 8.92700235 | 4.11670132 | -0.9994352 | 4.7858E-08 | 2.6212E-06 |
| Wdr4          | 8.16022015 | 2.66166574 | -1.5006768 | 5.005E-08  | 2.6692E-06 |
| Cnn3          | 20.3048434 | 10.1218672 | -0.8891812 | 5.0405E-08 | 2.677E-06  |
| Ftsj3         | 42.8574198 | 15.8569984 | -1.32926   | 5.3539E-08 | 2.802E-06  |
| Bri3bp        | 10.6187778 | 4.06748322 | -1.2693983 | 5.482E-08  | 2.8278E-06 |
| Mfsd2a        | 13.1107067 | 4.20057975 | -1.5476844 | 5.5798E-08 | 2.8582E-06 |
| Pdxk          | 4.49105218 | 1.47523748 | -1.4961434 | 5.6151E-08 | 2.8639E-06 |
| Rpf2          | 33.085641  | 11.9939701 | -1.3517842 | 5.7114E-08 | 2.8746E-06 |
| Pa2g4         | 157.989551 | 64.8145755 | -1.1815235 | 5.8494E-08 | 2.9197E-06 |
| Dctpp1        | 104.449569 | 41.5536628 | -1.2216924 | 5.8752E-08 | 2.9222E-06 |
| Sms           | 9.92595213 | 4.63665307 | -0.9770364 | 5.967E-08  | 2.9573E-06 |
| Mrpl42        | 19.0662535 | 8.79094583 | -1.0058073 | 6.02E-08   | 2.9731E-06 |
| Ranbp1        | 69.1663027 | 28.1863745 | -1.1963613 | 6.1693E-08 | 3.0362E-06 |
| Marcks1       | 67.6115029 | 16.5464035 | -1.9421071 | 6.2402E-08 | 3.0424E-06 |
| Mif           | 444.464436 | 180.882376 | -1.1984281 | 6.3179E-08 | 3.0663E-06 |
| Gmip          | 8.99818043 | 4.87243959 | -0.7683209 | 6.5782E-08 | 3.1598E-06 |
| Rrp1b         | 12.4511431 | 3.98094015 | -1.5597112 | 6.6686E-08 | 3.1745E-06 |
| Slc20a1       | 8.91007222 | 4.51009675 | -0.868933  | 6.7554E-08 | 3.2011E-06 |
| Tkt           | 74.2154403 | 36.1727783 | -0.9279239 | 7.1054E-08 | 3.3112E-06 |
| Ydjc          | 2.45014308 | 0.75441484 | -1.567073  | 7.1976E-08 | 3.325E-06  |
| Gypc          | 24.3544816 | 5.114789   | -2.1513416 | 7.4045E-08 | 3.4051E-06 |
| Pmvk          | 23.4429288 | 12.4607926 | -0.7994702 | 7.4342E-08 | 3.4076E-06 |
| Traf4         | 18.0326208 | 8.87540096 | -0.9110618 | 7.5373E-08 | 3.4341E-06 |
| Shmt1         | 30.9301267 | 7.21985001 | -2.018633  | 7.6658E-08 | 3.4684E-06 |
| Wdr12         | 6.10414455 | 2.55028156 | -1.1411704 | 7.7098E-08 | 3.4771E-06 |
| Farsa         | 21.1588978 | 11.4584934 | -0.7714129 | 7.8651E-08 | 3.5021E-06 |
| Snmp70        | 40.9377394 | 21.0592483 | -0.8508479 | 8.0516E-08 | 3.5738E-06 |
| 1110038B12Rik | 28.3962719 | 13.6917727 | -0.9373481 | 8.2723E-08 | 3.6602E-06 |



|          |            |            |            |            |            |
|----------|------------|------------|------------|------------|------------|
| Nbeal2   | 2.84961182 | 1.2279435  | -1.0983979 | 8.4425E-08 | 3.7005E-06 |
| Isyna1   | 75.4849984 | 30.5360452 | -1.2085092 | 8.5468E-08 | 3.7315E-06 |
| Nop56    | 69.6960607 | 25.0986184 | -1.3767177 | 8.5665E-08 | 3.7315E-06 |
| Epcam    | 13.5267062 | 6.45817477 | -0.9461685 | 8.6845E-08 | 3.7396E-06 |
| Gm17494  | 0.81248176 | 0.21012953 | -1.8300529 | 8.9296E-08 | 3.7717E-06 |
| Mtap     | 37.2196081 | 15.4490726 | -1.1580458 | 8.9547E-08 | 3.7717E-06 |
| Nsun5    | 6.28065341 | 2.78564997 | -1.0540886 | 9.3574E-08 | 3.8946E-06 |
| Pum3     | 14.4612984 | 6.43405529 | -1.0614411 | 9.4464E-08 | 3.92E-06   |
| Pgs1     | 9.90426581 | 5.79722283 | -0.6578622 | 9.565E-08  | 3.9575E-06 |
| Cacybp   | 82.1216986 | 30.058963  | -1.3420252 | 1.0206E-07 | 4.1306E-06 |
| Mvd      | 25.0809168 | 13.5491604 | -0.7781807 | 1.0117E-07 | 4.1306E-06 |
| Pus7     | 7.8476253  | 2.68193855 | -1.4377053 | 1.0219E-07 | 4.1306E-06 |
| Nudc     | 152.269089 | 63.8001613 | -1.1534943 | 1.0279E-07 | 4.1428E-06 |
| Gapdh    | 461.304721 | 240.23328  | -0.8326048 | 1.0488E-07 | 4.1723E-06 |
| Hmgn1    | 93.4987252 | 51.0894805 | -0.7611395 | 1.048E-07  | 4.1723E-06 |
| Sc5d     | 12.0999582 | 6.95568025 | -0.684767  | 1.0656E-07 | 4.1984E-06 |
| Ddx11    | 4.29229073 | 2.12125418 | -0.8978846 | 1.1414E-07 | 4.4396E-06 |
| Pnn      | 23.0757921 | 11.9046688 | -0.846196  | 1.1442E-07 | 4.4396E-06 |
| Crtc2    | 16.9579125 | 9.89598325 | -0.6626003 | 1.1598E-07 | 4.4609E-06 |
| Gart     | 57.972664  | 20.6816937 | -1.3859317 | 1.1991E-07 | 4.558E-06  |
| Atad3a   | 28.1887967 | 10.1383583 | -1.3744741 | 1.2064E-07 | 4.5731E-06 |
| Hsp90aa1 | 255.105755 | 89.7493845 | -1.4181893 | 1.2211E-07 | 4.5919E-06 |
| Snhg12   | 8.44866987 | 4.22167947 | -0.8833022 | 1.2376E-07 | 4.6291E-06 |
| Tagln2   | 139.55187  | 73.8092625 | -0.8071984 | 1.2375E-07 | 4.6291E-06 |
| Serbp1   | 41.4719696 | 20.2192668 | -0.9270339 | 1.2535E-07 | 4.6519E-06 |
| Slc29a1  | 10.8451604 | 4.61380416 | -1.1208001 | 1.2534E-07 | 4.6519E-06 |
| Wdr77    | 6.82500732 | 2.93431452 | -1.1041624 | 1.2537E-07 | 4.6519E-06 |
| Nsun2    | 58.2075831 | 23.40093   | -1.2121876 | 1.3414E-07 | 4.938E-06  |
| Mrto4    | 39.5360771 | 14.1046177 | -1.3842843 | 1.3775E-07 | 5.0448E-06 |
| Noc2l    | 54.9085113 | 22.3461613 | -1.1979513 | 1.3751E-07 | 5.0448E-06 |
| Cct8     | 156.429099 | 70.8344859 | -1.0427393 | 1.394E-07  | 5.0637E-06 |
| Fubp1    | 14.5763978 | 6.31556817 | -1.101349  | 1.3946E-07 | 5.0637E-06 |
| Pwp2     | 17.403609  | 7.11706501 | -1.1798677 | 1.3953E-07 | 5.0637E-06 |
| Carm1    | 21.1767643 | 10.6469565 | -0.8860249 | 1.4498E-07 | 5.0759E-06 |
| Dctd     | 5.06466071 | 1.30827224 | -1.8220852 | 1.4324E-07 | 5.0759E-06 |
| Fcer2a   | 4.94588061 | 0.73456418 | -2.6976286 | 1.4348E-07 | 5.0759E-06 |
| Gar1     | 41.9545035 | 17.6328305 | -1.1457304 | 1.4474E-07 | 5.0759E-06 |
| Gpn1     | 4.48627678 | 2.17971584 | -0.9274573 | 1.4197E-07 | 5.0759E-06 |
| Hsd17b7  | 5.32479599 | 1.89669135 | -1.3976029 | 1.4406E-07 | 5.0759E-06 |
| Pdcd5    | 19.7635177 | 11.0586376 | -0.7230124 | 1.438E-07  | 5.0759E-06 |
| Sema7a   | 25.2682779 | 12.7709944 | -0.8749612 | 1.4858E-07 | 5.1583E-06 |
| Ak2      | 87.5968588 | 41.6964534 | -0.9638116 | 1.5025E-07 | 5.1905E-06 |
| Dbi      | 63.3523148 | 31.5611039 | -0.8936292 | 1.5424E-07 | 5.2786E-06 |
| Fgd2     | 8.96809311 | 2.80076271 | -1.5533949 | 1.5485E-07 | 5.2786E-06 |
| Hspd1    | 280.824307 | 97.0305934 | -1.4529475 | 1.5505E-07 | 5.2786E-06 |

|               |            |            |            |            |            |
|---------------|------------|------------|------------|------------|------------|
| Prag1         | 7.21418876 | 3.43495381 | -0.9593574 | 1.5391E-07 | 5.2786E-06 |
| Hirip3        | 31.7030198 | 14.7276123 | -1.0076799 | 1.605E-07  | 5.3108E-06 |
| Nasp          | 34.3617743 | 14.1421082 | -1.1874818 | 1.5762E-07 | 5.3108E-06 |
| Trap1         | 54.8779605 | 28.3681383 | -0.8416449 | 1.6119E-07 | 5.3108E-06 |
| Utp4          | 29.4714393 | 10.7522815 | -1.3504047 | 1.5794E-07 | 5.3108E-06 |
| 3110082I17Rik | 9.6509888  | 3.27484572 | -1.4453386 | 1.6219E-07 | 5.3276E-06 |
| Mat2a         | 51.7360175 | 19.6367395 | -1.2907867 | 1.6639E-07 | 5.3772E-06 |
| Wdr46         | 30.1119942 | 13.6781825 | -1.0309348 | 1.6678E-07 | 5.3776E-06 |
| Anp32a        | 73.6579402 | 33.7832778 | -1.0216852 | 1.6783E-07 | 5.3872E-06 |
| Grap          | 66.0028612 | 34.2189432 | -0.8293041 | 1.7144E-07 | 5.4481E-06 |
| Slc2a1        | 17.5323248 | 9.85000774 | -0.7156347 | 1.7767E-07 | 5.6125E-06 |
| Acy1          | 6.40415738 | 2.25328174 | -1.4020424 | 1.7909E-07 | 5.6226E-06 |
| Slc29a2       | 1.07433067 | 0.17848101 | -2.4613394 | 1.7919E-07 | 5.6226E-06 |
| Snhg3         | 13.3713253 | 3.80653698 | -1.7136906 | 1.8027E-07 | 5.644E-06  |
| A630001G21Rik | 27.5241587 | 15.6243202 | -0.701754  | 1.812E-07  | 5.6575E-06 |
| Gemin6        | 27.4336311 | 13.3229124 | -0.9302028 | 1.8151E-07 | 5.6575E-06 |
| Pnpt1         | 20.4644811 | 8.72513327 | -1.1207023 | 1.8715E-07 | 5.7693E-06 |
| Fam111a       | 34.7621613 | 14.7941072 | -1.1324791 | 1.8855E-07 | 5.7994E-06 |
| Snrpa1        | 24.9647853 | 11.6509704 | -0.9926056 | 1.9069E-07 | 5.8397E-06 |
| Pgd           | 20.9643447 | 9.9754339  | -0.9566437 | 1.9122E-07 | 5.8432E-06 |
| Acaca         | 5.08754614 | 2.45588342 | -0.9447636 | 1.9337E-07 | 5.896E-06  |
| Fbl           | 37.5159634 | 14.8553059 | -1.2331585 | 1.9535E-07 | 5.9308E-06 |
| Set           | 174.478943 | 75.389788  | -1.1075613 | 1.9672E-07 | 5.9465E-06 |
| Fdft1         | 15.6190544 | 8.82099841 | -0.7132296 | 1.9978E-07 | 6.0002E-06 |
| Ppan          | 25.1963056 | 12.5514582 | -0.8992079 | 2.1015E-07 | 6.2316E-06 |
| Exosc1        | 11.2718921 | 5.32594244 | -0.9673966 | 2.1384E-07 | 6.3131E-06 |
| Lyar          | 68.499119  | 27.0162705 | -1.2414494 | 2.215E-07  | 6.4229E-06 |
| Sephs2        | 58.3709451 | 32.0605618 | -0.7497708 | 2.2074E-07 | 6.4229E-06 |
| Ddx55         | 4.69351957 | 2.4646651  | -0.8150927 | 2.2668E-07 | 6.5286E-06 |
| Dnajc2        | 29.2803674 | 14.9192668 | -0.8673129 | 2.2968E-07 | 6.5478E-06 |
| Dph2          | 7.05286765 | 3.63434931 | -0.8418329 | 2.2913E-07 | 6.5478E-06 |
| Nop2          | 52.5885297 | 20.3055697 | -1.2622746 | 2.2884E-07 | 6.5478E-06 |
| Uhrf1         | 75.7194421 | 35.5059418 | -0.994123  | 2.2968E-07 | 6.5478E-06 |
| Cluh          | 25.3568144 | 8.58660034 | -1.4756737 | 2.351E-07  | 6.6887E-06 |
| Ddx51         | 8.47567661 | 3.69402117 | -1.0739422 | 2.3558E-07 | 6.6888E-06 |
| Dkc1          | 39.8639743 | 14.4054823 | -1.3735196 | 2.3687E-07 | 6.7118E-06 |
| Cyth4         | 15.4093794 | 8.37167125 | -0.7706545 | 2.3972E-07 | 6.7533E-06 |
| Tfdp1         | 78.4400917 | 35.250557  | -1.0554852 | 2.4103E-07 | 6.7613E-06 |
| Prpf3         | 11.8770045 | 6.31080232 | -0.8030732 | 2.4451E-07 | 6.8453E-06 |
| Rrp12         | 19.9857853 | 7.5280107  | -1.3074798 | 2.5147E-07 | 6.9568E-06 |
| Setd6         | 7.59376952 | 2.63229132 | -1.4140686 | 2.5144E-07 | 6.9568E-06 |
| U2af1         | 52.6335964 | 27.1078286 | -0.8538408 | 2.5132E-07 | 6.9568E-06 |
| Ddx21         | 101.707977 | 45.9277155 | -1.0458448 | 2.5357E-07 | 6.9653E-06 |
| Dph5          | 3.27185564 | 1.51218776 | -0.9893894 | 2.5426E-07 | 6.9653E-06 |
| Ripk3         | 27.5796962 | 15.4859769 | -0.7212982 | 2.5245E-07 | 6.9653E-06 |

|          |            |            |            |            |            |
|----------|------------|------------|------------|------------|------------|
| Bzw2     | 24.2934115 | 10.0132953 | -1.1776276 | 2.6184E-07 | 7.0683E-06 |
| Gpatch4  | 24.1588158 | 10.0074096 | -1.1673468 | 2.6191E-07 | 7.0683E-06 |
| Polr3g   | 3.59767821 | 1.47671818 | -1.1588163 | 2.6199E-07 | 7.0683E-06 |
| Rsl1d1   | 104.282222 | 45.7529902 | -1.0823063 | 2.6023E-07 | 7.0683E-06 |
| Polr1b   | 13.9586963 | 5.32160318 | -1.2849283 | 2.661E-07  | 7.1227E-06 |
| Wdr18    | 16.6156591 | 8.48377892 | -0.861252  | 2.6561E-07 | 7.1227E-06 |
| Atic     | 27.831701  | 9.63385869 | -1.4437515 | 2.6841E-07 | 7.1376E-06 |
| Nhp2     | 133.783012 | 50.1121426 | -1.3038279 | 2.8276E-07 | 7.3991E-06 |
| Cd3eap   | 11.0155385 | 3.73219713 | -1.4547488 | 2.8961E-07 | 7.4945E-06 |
| Exosc2   | 22.9074875 | 9.79700992 | -1.1144129 | 2.9198E-07 | 7.4988E-06 |
| Shisa8   | 28.7109486 | 10.2772456 | -1.3666173 | 2.9136E-07 | 7.4988E-06 |
| Acly     | 62.6426972 | 36.7993259 | -0.6581826 | 2.9694E-07 | 7.5622E-06 |
| Chaf1b   | 9.77405337 | 4.40342274 | -1.0399261 | 2.9872E-07 | 7.5622E-06 |
| Phb2     | 86.2160716 | 42.4177006 | -0.9084764 | 2.9679E-07 | 7.5622E-06 |
| Tra2a    | 16.3512252 | 9.13556906 | -0.7289314 | 2.985E-07  | 7.5622E-06 |
| Ybx3     | 150.447731 | 64.2561079 | -1.1313189 | 2.9923E-07 | 7.5622E-06 |
| Snhg1    | 28.2846716 | 14.5070464 | -0.8515614 | 3.0426E-07 | 7.6479E-06 |
| Bop1     | 60.4070115 | 27.5585146 | -1.024434  | 3.0643E-07 | 7.677E-06  |
| Noc4l    | 32.7978959 | 13.7458394 | -1.1449604 | 3.076E-07  | 7.677E-06  |
| Tnfrsf22 | 1.66451967 | 0.63650961 | -1.2771072 | 3.1222E-07 | 7.7371E-06 |
| Tomm40   | 44.066503  | 19.233421  | -1.0999855 | 3.1125E-07 | 7.7371E-06 |
| Lactb2   | 6.02471241 | 2.92714593 | -0.9238601 | 3.1585E-07 | 7.7739E-06 |
| Sp110    | 18.2486258 | 9.12240564 | -0.8904227 | 3.1514E-07 | 7.7739E-06 |
| Ptpn6    | 61.2230187 | 25.0689157 | -1.1788882 | 3.1875E-07 | 7.816E-06  |
| Tardbp   | 43.2135414 | 22.1910373 | -0.8582379 | 3.2934E-07 | 8.0065E-06 |
| Uchl5    | 18.5742391 | 9.15139617 | -0.90832   | 3.2937E-07 | 8.0065E-06 |
| Nop10    | 70.8135977 | 29.4845157 | -1.1487389 | 3.3141E-07 | 8.0134E-06 |
| Pfas     | 14.9393854 | 6.29193403 | -1.1521317 | 3.3157E-07 | 8.0134E-06 |
| Rnps1    | 36.0336989 | 19.7844529 | -0.7580303 | 3.3085E-07 | 8.0134E-06 |
| Ddx39b   | 65.8868456 | 37.1617358 | -0.7183831 | 3.3411E-07 | 8.0243E-06 |
| Cdca7    | 28.7154846 | 8.86420421 | -1.593075  | 3.3471E-07 | 8.0248E-06 |
| Ppat     | 25.0878496 | 9.80951587 | -1.2613522 | 3.3681E-07 | 8.0478E-06 |
| Akap8    | 14.3351994 | 7.69481542 | -0.786104  | 3.4231E-07 | 8.0631E-06 |
| Dek      | 58.9413279 | 23.8490641 | -1.1989629 | 3.4262E-07 | 8.0631E-06 |
| Dhodh    | 4.0529472  | 1.91596783 | -0.9649886 | 3.4012E-07 | 8.0631E-06 |
| Otud6b   | 21.9949089 | 12.240962  | -0.734482  | 3.3863E-07 | 8.0631E-06 |
| Pdcd11   | 15.1730927 | 8.20718644 | -0.7782819 | 3.3983E-07 | 8.0631E-06 |
| Mybbp1a  | 112.341809 | 45.3315558 | -1.2075281 | 3.4527E-07 | 8.1105E-06 |
| Rbm19    | 12.3681261 | 5.75482361 | -0.9998359 | 3.4579E-07 | 8.1105E-06 |
| Lsm7     | 12.7719719 | 5.22323763 | -1.1710838 | 3.4747E-07 | 8.1232E-06 |
| Pif1     | 7.94548809 | 3.99930293 | -0.8791316 | 3.4749E-07 | 8.1232E-06 |
| Arglu1   | 15.6442207 | 7.37871689 | -0.9687233 | 3.4907E-07 | 8.1464E-06 |
| Mettl16  | 5.78411786 | 2.57338555 | -1.060601  | 3.5388E-07 | 8.2328E-06 |
| Slc6a6   | 8.21250997 | 4.53053398 | -0.7436557 | 3.5588E-07 | 8.2497E-06 |
| Igsf8    | 5.26673181 | 2.53394636 | -0.9429703 | 3.5815E-07 | 8.2758E-06 |

|               |            |            |            |            |            |
|---------------|------------|------------|------------|------------|------------|
| Elac2         | 18.6556986 | 8.76591846 | -0.9795827 | 3.6E-07    | 8.2763E-06 |
| Npm1          | 641.680216 | 321.760204 | -0.8850113 | 3.5959E-07 | 8.2763E-06 |
| Rrp9          | 26.9895929 | 9.18592957 | -1.4494495 | 3.5996E-07 | 8.2763E-06 |
| Zfp608        | 1.71133655 | 0.82776843 | -0.927823  | 3.6053E-07 | 8.2763E-06 |
| Luc7l3        | 16.6864888 | 9.901422   | -0.637643  | 3.6113E-07 | 8.2764E-06 |
| Rrs1          | 42.0211858 | 18.4623088 | -1.0771518 | 3.6311E-07 | 8.2947E-06 |
| Tars2         | 8.74745541 | 4.93144657 | -0.7171052 | 3.6254E-07 | 8.2947E-06 |
| C1qbp         | 120.598641 | 50.2476547 | -1.1640199 | 3.6629E-07 | 8.3268E-06 |
| Nip7          | 24.5138904 | 11.0160419 | -1.0354401 | 3.6711E-07 | 8.3319E-06 |
| Tbrg4         | 36.8265773 | 18.7357568 | -0.8677646 | 3.7077E-07 | 8.4013E-06 |
| Dis3          | 13.3028362 | 5.80618046 | -1.0952203 | 3.7159E-07 | 8.4062E-06 |
| Lbhd1         | 3.90550219 | 1.87189609 | -0.9453705 | 3.7824E-07 | 8.5292E-06 |
| Agpat5        | 5.47982335 | 2.86237079 | -0.8275443 | 3.8918E-07 | 8.72E-06   |
| Fabp5         | 5.70244802 | 1.61362848 | -1.7075375 | 3.8994E-07 | 8.723E-06  |
| Amd1          | 23.1959124 | 10.989617  | -0.9728992 | 3.9643E-07 | 8.8119E-06 |
| Stip1         | 170.703396 | 75.2983801 | -1.078698  | 4.0421E-07 | 8.9423E-06 |
| Cd40          | 10.4896306 | 3.49203991 | -1.4361713 | 4.0538E-07 | 8.954E-06  |
| Cct6a         | 133.369771 | 58.8690206 | -1.0694067 | 4.1025E-07 | 8.973E-06  |
| Ebna1bp2      | 31.9362662 | 14.6199572 | -1.0213358 | 4.1136E-07 | 8.973E-06  |
| Eef1akmt      | 3.8005288  | 1.74309112 | -1.0168398 | 4.0951E-07 | 8.973E-06  |
| Nop58         | 29.6806354 | 13.4691936 | -1.0373355 | 4.1135E-07 | 8.973E-06  |
| Tuba1b        | 207.392068 | 85.0044206 | -1.1849099 | 4.1332E-07 | 9.0018E-06 |
| Impdh2        | 90.7190753 | 46.4679314 | -0.8541398 | 4.1653E-07 | 9.0437E-06 |
| Nap1l1        | 113.513733 | 62.0763688 | -0.7620347 | 4.193E-07  | 9.0758E-06 |
| Kat2a         | 18.5453048 | 8.85440777 | -0.9626712 | 4.2071E-07 | 9.0922E-06 |
| 2810004N23Rik | 9.68216348 | 4.88400704 | -0.8690086 | 4.2295E-07 | 9.0986E-06 |
| Acsl4         | 17.1770638 | 10.8478202 | -0.549714  | 4.2256E-07 | 9.0986E-06 |
| Dnaja1        | 16.5014827 | 8.08866449 | -0.9139051 | 4.2263E-07 | 9.0986E-06 |

238  
239

**Supplementary Table 2 : 250 top up regulated genes in Sec22b<sup>B-KO</sup> PCs**

| GEnE_Name | FPKM.WT    | FPKM.KO    | log2FC     | pval       | qval       |
|-----------|------------|------------|------------|------------|------------|
| Rcn3      | 3.95244129 | 28.2256264 | 2.94541415 | 3.6538E-13 | 5.1248E-09 |
| Aldh1l2   | 0.97068046 | 14.9693242 | 4.06771228 | 9.7284E-13 | 6.8225E-09 |
| Anxa5     | 19.6312692 | 67.6798591 | 1.90267766 | 5.8389E-12 | 1.6379E-08 |
| Ighv1-12  | 91.3141777 | 262.873354 | 1.63770725 | 3.6498E-12 | 1.6379E-08 |
| KdElr3    | 2.89563443 | 32.0034861 | 3.58792461 | 5.6699E-12 | 1.6379E-08 |
| Hapln4    | 0.35185669 | 3.1586156  | 3.26100562 | 7.1344E-12 | 1.6678E-08 |
| Atf5      | 37.1824171 | 186.050449 | 2.43096651 | 2.3181E-11 | 4.0642E-08 |
| Ighv1-74  | 158.191774 | 407.725183 | 1.48005927 | 4.2968E-11 | 6.0267E-08 |
| Pck2      | 30.2316111 | 123.439586 | 2.13980755 | 6.8118E-11 | 7.1963E-08 |
| Ptov1     | 0.83255733 | 5.15312938 | 2.72882675 | 6.7398E-11 | 7.1963E-08 |
| VEgfa     | 16.4845734 | 44.916135  | 1.56414288 | 7.696E-11  | 7.1963E-08 |
| Fcrla     | 30.0184528 | 70.5261476 | 1.34403108 | 1.1394E-10 | 9.7678E-08 |
| Pycr1     | 13.500785  | 51.9078507 | 2.06442437 | 1.2535E-10 | 9.7678E-08 |
| Tmc6      | 6.75469967 | 14.7802354 | 1.24056449 | 1.2089E-10 | 9.7678E-08 |
| Hdac9     | 2.09836795 | 7.90746978 | 2.01222542 | 1.7737E-10 | 1.2148E-07 |
| Ighv1-78  | 175.033675 | 523.163136 | 1.69867469 | 1.9054E-10 | 1.2148E-07 |
| Dusp5     | 7.48036711 | 16.5835982 | 1.26197664 | 2.0654E-10 | 1.2596E-07 |
| Rassf4    | 3.35563798 | 7.90633389 | 1.34615616 | 2.4681E-10 | 1.4424E-07 |
| SElEnom   | 5.10934057 | 17.8335482 | 1.91632104 | 3.0367E-10 | 1.7037E-07 |
| MagEd2    | 0.55352151 | 6.23833266 | 3.57222716 | 3.2248E-10 | 1.7397E-07 |
| B3gnt9    | 5.26744261 | 21.6136886 | 2.14346305 | 4.5583E-10 | 1.776E-07  |
| Cd28      | 1.30171125 | 7.0354162  | 2.53282616 | 3.6945E-10 | 1.776E-07  |
| CEbpb     | 24.8524107 | 61.4684689 | 1.41125685 | 3.8996E-10 | 1.776E-07  |
| Ighv8-8   | 296.018709 | 1102.1792  | 1.99658704 | 3.4409E-10 | 1.776E-07  |
| MagEd1    | 7.11806636 | 24.2847606 | 1.86880346 | 4.4644E-10 | 1.776E-07  |
| PIEkha1   | 2.15696285 | 5.23836059 | 1.39050571 | 4.1291E-10 | 1.776E-07  |
| Plxna1    | 4.27809191 | 14.4071916 | 1.86793714 | 3.9552E-10 | 1.776E-07  |
| Rrm2b     | 2.58130441 | 6.10816923 | 1.35127282 | 4.1430E-10 | 1.776E-07  |
| Sft2d2    | 34.4282347 | 94.6883489 | 1.57779801 | 4.5466E-10 | 1.776E-07  |
| Fam129a   | 4.81711927 | 18.273281  | 2.02779748 | 4.7637E-10 | 1.8059E-07 |
| Fam114a1  | 0.76205666 | 5.12239184 | 2.85050222 | 5.3447E-10 | 1.9704E-07 |
| Ighv3-8   | 77.7134879 | 326.521966 | 2.20463601 | 5.6191E-10 | 1.9704E-07 |
| SEsn2     | 14.7650456 | 42.4472139 | 1.63728825 | 5.4822E-10 | 1.9704E-07 |
| Evi2a     | 18.0110335 | 60.8388687 | 1.85330884 | 5.7990E-10 | 1.9839E-07 |
| SEc23a    | 17.8776281 | 41.4506525 | 1.32789755 | 6.2665E-10 | 2.0297E-07 |
| Tifa      | 2.09109694 | 5.69958631 | 1.55636589 | 6.2694E-10 | 2.0297E-07 |
| Zfp9      | 1.32972835 | 4.3112639  | 1.79831354 | 6.3671E-10 | 2.0297E-07 |
| Copz2     | 0.47058406 | 5.95454045 | 3.74816703 | 6.7108E-10 | 2.0462E-07 |
| Ighv1-58  | 47.8972969 | 152.838548 | 1.77586681 | 6.6684E-10 | 2.0462E-07 |
| Lasp1     | 6.64790742 | 11.9180495 | 0.95523756 | 6.8654E-10 | 2.0488E-07 |
| Ikbip     | 1.87484725 | 4.98237371 | 1.52239466 | 8.4695E-10 | 2.4677E-07 |
| CtsE      | 3.51488042 | 9.15376791 | 1.49343696 | 9.1224E-10 | 2.559E-07  |
| Igkv12-98 | 107.721563 | 263.505214 | 1.40215105 | 9.3287E-10 | 2.5656E-07 |

|            |            |            |            |            |            |
|------------|------------|------------|------------|------------|------------|
| Abr        | 2.51223188 | 5.24500495 | 1.17245331 | 1.0646E-09 | 2.6198E-07 |
| BhlhE41    | 4.74207339 | 10.1582443 | 1.20860153 | 1.053E-09  | 2.6198E-07 |
| Irgq       | 8.82528071 | 21.3618862 | 1.39116172 | 1.0566E-09 | 2.6198E-07 |
| Slc3a2     | 111.000524 | 280.504692 | 1.44873381 | 1.0405E-09 | 2.6198E-07 |
| Slc6a9     | 1.9816791  | 10.5969137 | 2.51914349 | 9.9537E-10 | 2.6198E-07 |
| TmEm263    | 15.8314176 | 30.2251103 | 1.04471015 | 1.0584E-09 | 2.6198E-07 |
| Chpf2      | 15.8208273 | 32.512173  | 1.15506603 | 1.0876E-09 | 2.6301E-07 |
| Faah       | 3.57928509 | 7.79686525 | 1.23410039 | 1.1463E-09 | 2.725E-07  |
| ArfgEf3    | 1.18740969 | 6.65536999 | 2.62340302 | 1.2781E-09 | 2.9879E-07 |
| Dap        | 43.035225  | 111.589761 | 1.49780095 | 1.3962E-09 | 3.12E-07   |
| MLEc       | 88.0293766 | 149.8739   | 0.88147187 | 1.5084E-09 | 3.2548E-07 |
| Mxd4       | 8.35434174 | 25.9818553 | 1.7554385  | 1.4977E-09 | 3.2548E-07 |
| Igkv16-104 | 680.272709 | 1459.30687 | 1.21156747 | 1.6217E-09 | 3.4463E-07 |
| Chac1      | 29.129383  | 82.906231  | 1.62728404 | 1.6769E-09 | 3.4588E-07 |
| S100a11    | 55.1503858 | 151.389057 | 1.57104305 | 1.6753E-09 | 3.4588E-07 |
| Igkv4-50   | 141.049356 | 449.891241 | 1.77035923 | 1.7417E-09 | 3.5129E-07 |
| TmEm26     | 1.1636833  | 3.8498455  | 1.84833775 | 1.7532E-09 | 3.5129E-07 |
| Slc7a11    | 0.61297132 | 3.0328239  | 2.42421242 | 1.807E-09  | 3.5698E-07 |
| LEprotl1   | 14.9103053 | 31.9438619 | 1.21314019 | 1.9815E-09 | 3.86E-07   |
| RnasE6     | 6.56501051 | 16.2070318 | 1.40848039 | 2.0498E-09 | 3.9385E-07 |
| Pi4k2b     | 8.53958866 | 15.5458883 | 0.97382013 | 2.2604E-09 | 4.2843E-07 |
| Cth        | 7.15494982 | 33.6687109 | 2.35881238 | 2.358E-09  | 4.4098E-07 |
| Trim35     | 19.016521  | 33.4483627 | 0.92676024 | 2.4585E-09 | 4.4784E-07 |
| Vim        | 10.3259516 | 20.7216025 | 1.1177967  | 2.5649E-09 | 4.6123E-07 |
| Ighv1-75   | 211.47111  | 524.66666  | 1.42540097 | 2.6451E-09 | 4.6962E-07 |
| Pgghg      | 3.03465101 | 6.91086231 | 1.29198015 | 2.7368E-09 | 4.7984E-07 |
| Igkv3-7    | 88.0774887 | 390.419959 | 2.23318595 | 3.0091E-09 | 5.2105E-07 |
| Fut1       | 3.32197449 | 11.546848  | 1.90485349 | 3.1433E-09 | 5.2677E-07 |
| Mvb12b     | 1.98977647 | 5.57786571 | 1.60793752 | 3.1426E-09 | 5.2677E-07 |
| Igkv3-12   | 211.75589  | 469.149729 | 1.26373459 | 3.3043E-09 | 5.4524E-07 |
| Rab3d      | 2.99415195 | 9.6165486  | 1.79447135 | 3.492E-09  | 5.6952E-07 |
| Ighv5-6    | 222.340625 | 498.126916 | 1.27894106 | 3.547E-09  | 5.7185E-07 |
| Dynlt3     | 13.0618782 | 23.145537  | 0.93705408 | 3.7139E-09 | 5.853E-07  |
| Ighv1-72   | 356.730241 | 683.831458 | 1.05372924 | 3.8906E-09 | 6.0632E-07 |
| MagEh1     | 2.21778289 | 10.4676177 | 2.36410193 | 3.9542E-09 | 6.0948E-07 |
| Gpt2       | 6.76469786 | 16.8743894 | 1.43288768 | 4.2146E-09 | 6.4254E-07 |
| Gpr107     | 3.26184279 | 5.67661715 | 0.91165444 | 4.4574E-09 | 6.7225E-07 |
| Psd3       | 0.90277054 | 2.11359823 | 1.3441571  | 4.5302E-09 | 6.7596E-07 |
| PdE4dip    | 4.33027968 | 8.79605459 | 1.13419308 | 4.6921E-09 | 6.9172E-07 |
| Rap1gap2   | 2.37365066 | 7.12641108 | 1.68732496 | 4.8627E-09 | 6.9596E-07 |
| Ighv9-3    | 845.080869 | 1823.04019 | 1.22378646 | 5.1931E-09 | 7.3574E-07 |
| Sla        | 10.3130531 | 33.0893294 | 1.7887961  | 5.4657E-09 | 7.6662E-07 |
| Arfgap1    | 13.6506179 | 23.2193189 | 0.88013341 | 5.9282E-09 | 7.922E-07  |
| Ighv7-1    | 57.8715547 | 185.210762 | 1.78376919 | 5.9305E-09 | 7.922E-07  |
| Atp1b1     | 2.2660117  | 9.54716438 | 2.17686473 | 5.9887E-09 | 7.9243E-07 |

|               |            |            |            |            |            |
|---------------|------------|------------|------------|------------|------------|
| Wipi1         | 3.7306877  | 10.6721124 | 1.61168347 | 6.1487E-09 | 8.06E-07   |
| Ighv1-64      | 617.173425 | 1204.09356 | 1.07509134 | 6.2841E-09 | 8.1328E-07 |
| Igkv2-109     | 287.82215  | 538.623955 | 1.01780736 | 6.6414E-09 | 8.4685E-07 |
| Chst12        | 17.2410663 | 34.2471491 | 1.10523494 | 6.9979E-09 | 8.7636E-07 |
| Rcn1          | 5.95526686 | 10.9502489 | 0.98721985 | 6.9631E-09 | 8.7636E-07 |
| Cxcr4         | 34.2194442 | 71.7828985 | 1.17502586 | 7.275E-09  | 9.0301E-07 |
| TcEal9        | 105.81069  | 187.609369 | 0.94026669 | 7.3757E-09 | 9.0746E-07 |
| Tbc1d20       | 14.202912  | 22.7946966 | 0.79525867 | 7.8723E-09 | 9.5187E-07 |
| Yipf3         | 26.4038598 | 51.001768  | 1.06570332 | 8.1676E-09 | 9.7914E-07 |
| Ighv1-59      | 136.162105 | 282.814039 | 1.17170051 | 8.3655E-09 | 9.9436E-07 |
| Hspa2         | 6.14059259 | 13.8861053 | 1.2802731  | 8.9608E-09 | 1.0262E-06 |
| ManEa         | 37.8668744 | 73.2119093 | 1.06531703 | 8.9992E-09 | 1.0262E-06 |
| SEc31a        | 38.1036651 | 66.136888  | 0.90935517 | 9.1265E-09 | 1.0323E-06 |
| CrEb3         | 16.5128894 | 29.5790395 | 0.9496466  | 9.3113E-09 | 1.0365E-06 |
| Jdp2          | 1.19205083 | 6.32176305 | 2.49753902 | 9.2812E-09 | 1.0365E-06 |
| Coro2b        | 2.28618196 | 5.05399866 | 1.25600966 | 9.5561E-09 | 1.0554E-06 |
| 4933421O10Rik | 2.28006423 | 5.15718667 | 1.28033209 | 9.8643E-09 | 1.0689E-06 |
| Yipf6         | 7.95407591 | 12.6897598 | 0.7875543  | 9.8369E-09 | 1.0689E-06 |
| Ighv4-1       | 99.3378797 | 302.735266 | 1.71218446 | 9.9876E-09 | 1.0694E-06 |
| Soat2         | 0.75885652 | 4.18559775 | 2.59352619 | 1.0314E-08 | 1.0959E-06 |
| Fam214a       | 9.33662461 | 21.2478234 | 1.30747877 | 1.1086E-08 | 1.1433E-06 |
| Sar1a         | 61.5542207 | 95.0026689 | 0.7386418  | 1.1042E-08 | 1.1433E-06 |
| Tlr4          | 2.18138918 | 4.80452863 | 1.2532204  | 1.1078E-08 | 1.1433E-06 |
| Ighv5-12      | 83.3384642 | 165.019472 | 1.09839051 | 1.1459E-08 | 1.1488E-06 |
| Raph1         | 0.36421368 | 1.1134717  | 1.70529336 | 1.1518E-08 | 1.1488E-06 |
| Sh3bp5l       | 4.36236038 | 7.68444982 | 0.92495883 | 1.1222E-08 | 1.1488E-06 |
| Trp53inp1     | 49.4207807 | 157.939944 | 1.79681397 | 1.1549E-08 | 1.1488E-06 |
| Man1a         | 63.5384161 | 108.541952 | 0.88776836 | 1.212E-08  | 1.1972E-06 |
| Dhrs7         | 9.05339474 | 23.5011877 | 1.48325556 | 1.2212E-08 | 1.1978E-06 |
| Asns          | 67.3838875 | 158.609161 | 1.35761004 | 1.2423E-08 | 1.21E-06   |
| Calu          | 89.7493436 | 142.866698 | 0.78412488 | 1.3481E-08 | 1.2951E-06 |
| Pofut2        | 3.77669546 | 6.54083503 | 0.90289031 | 1.3421E-08 | 1.2951E-06 |
| MEtrnl        | 2.07898767 | 5.48153633 | 1.5115834  | 1.3847E-08 | 1.3212E-06 |
| Ighv6-6       | 494.366889 | 1029.03481 | 1.16762602 | 1.4143E-08 | 1.3313E-06 |
| Nbas          | 22.376612  | 40.3065936 | 0.96697261 | 1.41E-08   | 1.3313E-06 |
| March8        | 1.14904799 | 2.59744859 | 1.27977824 | 1.4717E-08 | 1.367E-06  |
| Ttc39c        | 1.04253478 | 3.39717741 | 1.79315649 | 1.5201E-08 | 1.3935E-06 |
| Golim4        | 3.32533095 | 5.96200264 | 0.95450019 | 1.5589E-08 | 1.4107E-06 |
| Rhbdd1        | 4.06929643 | 8.09558848 | 1.10001075 | 1.5854E-08 | 1.4255E-06 |
| Ighv1-20      | 31.0580896 | 86.6437394 | 1.60413591 | 1.6336E-08 | 1.4493E-06 |
| Igkv1-122     | 105.305975 | 274.041408 | 1.48509659 | 1.6516E-08 | 1.4493E-06 |
| Igkv8-30      | 806.690665 | 2738.69763 | 1.85815638 | 1.6636E-08 | 1.4493E-06 |
| Il5ra         | 20.7553655 | 39.0275117 | 1.01678188 | 1.6576E-08 | 1.4493E-06 |
| Mospd1        | 10.6793553 | 21.7265592 | 1.12801229 | 1.6431E-08 | 1.4493E-06 |
| Ppp1r15a      | 15.8581232 | 27.9014134 | 0.93147207 | 1.6837E-08 | 1.4578E-06 |

|           |            |            |            |            |            |
|-----------|------------|------------|------------|------------|------------|
| Acbd3     | 11.6325609 | 18.0465504 | 0.74797655 | 1.7142E-08 | 1.4661E-06 |
| Gm14137   | 0.90074637 | 4.01583048 | 2.25172185 | 1.7088E-08 | 1.4661E-06 |
| Gm30211   | 12.2902208 | 24.1378561 | 1.08916142 | 1.7861E-08 | 1.5092E-06 |
| Ctla4     | 13.9760963 | 38.1724462 | 1.57311333 | 1.8213E-08 | 1.5297E-06 |
| IpcEf1    | 1.64955262 | 4.63477949 | 1.58437819 | 1.8441E-08 | 1.5305E-06 |
| Slc7a3    | 17.9017152 | 43.2030852 | 1.38682823 | 1.9278E-08 | 1.5906E-06 |
| Sqstm1    | 95.6690791 | 233.071757 | 1.39260349 | 1.9392E-08 | 1.5906E-06 |
| Rgs12     | 0.34547675 | 0.92013488 | 1.52553039 | 1.9682E-08 | 1.5986E-06 |
| TmEm167b  | 11.8839628 | 22.8986086 | 1.06340183 | 1.9717E-08 | 1.5986E-06 |
| Igkv1-88  | 106.94773  | 307.237129 | 1.63506914 | 2.0161E-08 | 1.6159E-06 |
| Ighv2-5   | 56.3886886 | 145.854396 | 1.47428516 | 2.0386E-08 | 1.6233E-06 |
| Slc12a4   | 6.60095176 | 11.5270568 | 0.91251442 | 2.0485E-08 | 1.6233E-06 |
| ErlEc1    | 24.5122791 | 45.4963191 | 1.00650571 | 2.0912E-08 | 1.6246E-06 |
| Gadd45a   | 10.2008496 | 28.4897161 | 1.58648332 | 2.0965E-08 | 1.6246E-06 |
| Tlr2      | 3.61433228 | 7.75343662 | 1.20865949 | 2.069E-08  | 1.6246E-06 |
| Hmox1     | 13.6122844 | 24.6654684 | 0.9677937  | 2.1635E-08 | 1.6673E-06 |
| Ddit3     | 6.14854641 | 17.8754547 | 1.62865743 | 2.2384E-08 | 1.7047E-06 |
| Igkv1-133 | 81.010718  | 234.867302 | 1.65210838 | 2.2484E-08 | 1.7047E-06 |
| Slc50a1   | 22.2875933 | 46.7446363 | 1.17191099 | 2.2465E-08 | 1.7047E-06 |
| Slc26a2   | 3.47573678 | 5.813726   | 0.85498431 | 2.2926E-08 | 1.7288E-06 |
| HErpud1   | 197.528765 | 357.204429 | 0.96986954 | 2.3247E-08 | 1.7402E-06 |
| Ighv14-3  | 271.711793 | 695.678222 | 1.47525945 | 2.3449E-08 | 1.7402E-06 |
| REEp6     | 0.46224492 | 2.50082952 | 2.52070194 | 2.3728E-08 | 1.7424E-06 |
| Igkv5-45  | 78.6227622 | 221.9713   | 1.58989651 | 2.4123E-08 | 1.7614E-06 |
| Unc13d    | 6.76383252 | 12.2349884 | 0.96284153 | 2.4237E-08 | 1.7614E-06 |
| Ighv13-2  | 87.1523552 | 238.350201 | 1.54552775 | 2.5359E-08 | 1.8162E-06 |
| St3gal1   | 13.8681071 | 22.7931321 | 0.83204387 | 2.538E-08  | 1.8162E-06 |
| EthE1     | 10.5008401 | 19.2597169 | 0.98359719 | 2.6478E-08 | 1.8852E-06 |
| Gfpt1     | 26.1110851 | 44.5335744 | 0.88472744 | 2.7662E-08 | 1.9399E-06 |
| Inpp4b    | 2.12924116 | 4.45148634 | 1.18314577 | 2.7625E-08 | 1.9399E-06 |
| REln      | 0.26533184 | 0.77656231 | 1.6720055  | 2.7612E-08 | 1.9399E-06 |
| Il2ra     | 5.12527102 | 10.4770576 | 1.13580663 | 2.864E-08  | 1.9887E-06 |
| Glipr2    | 27.8629379 | 50.970921  | 0.98469683 | 2.882E-08  | 1.9913E-06 |
| Gpr180    | 15.8570288 | 27.2937074 | 0.89726059 | 2.9468E-08 | 2.0261E-06 |
| Jchain    | 714.95209  | 1411.49132 | 1.09028911 | 2.998E-08  | 2.0413E-06 |
| Ighv1-76  | 317.430465 | 612.753878 | 1.06069791 | 3.1154E-08 | 2.1008E-06 |
| Snn       | 8.43828778 | 20.35443   | 1.3834221  | 3.1645E-08 | 2.1136E-06 |
| Kcnk6     | 9.75839385 | 18.5056735 | 1.03935722 | 3.1996E-08 | 2.1168E-06 |
| Cdkn1a    | 1.84936633 | 5.41871871 | 1.65105609 | 3.2588E-08 | 2.1359E-06 |
| Slc7a7    | 5.86009167 | 13.7831684 | 1.35063664 | 3.2529E-08 | 2.1359E-06 |
| Tvp23b    | 19.3302306 | 32.6427742 | 0.86499699 | 3.3936E-08 | 2.1834E-06 |
| Gpx3      | 6.16358458 | 30.3180393 | 2.38096243 | 3.4574E-08 | 2.1855E-06 |
| Trib2     | 8.63961301 | 15.8867067 | 0.99702627 | 3.4592E-08 | 2.1855E-06 |
| GnE       | 14.0232896 | 27.4199704 | 1.08280767 | 3.4933E-08 | 2.1938E-06 |
| PtprE     | 1.28405611 | 2.41783789 | 1.02138742 | 3.5308E-08 | 2.1996E-06 |



|            |            |            |            |            |            |
|------------|------------|------------|------------|------------|------------|
| Bsdc1      | 6.21022664 | 10.3785412 | 0.85146346 | 3.6098E-08 | 2.2227E-06 |
| Igkv15-103 | 400.681408 | 712.142057 | 0.93951616 | 3.6132E-08 | 2.2227E-06 |
| Ighv8-12   | 303.281523 | 740.773658 | 1.39210929 | 3.683E-08  | 2.2558E-06 |
| NdE11      | 15.4372666 | 24.3417372 | 0.76852059 | 3.7821E-08 | 2.2866E-06 |
| Inpp1      | 5.99734133 | 11.2262362 | 1.01543328 | 3.9591E-08 | 2.363E-06  |
| Crlf2      | 16.2972407 | 38.3597722 | 1.33544547 | 3.9815E-08 | 2.3663E-06 |
| Lipc       | 1.32408214 | 4.41486074 | 1.84464392 | 4.0313E-08 | 2.3858E-06 |
| Mon2       | 9.23027003 | 15.2361839 | 0.83883763 | 4.0637E-08 | 2.3909E-06 |
| Ttc39b     | 3.26640869 | 5.19248685 | 0.78041416 | 4.1332E-08 | 2.4155E-06 |
| Cul7       | 1.00084922 | 3.35346293 | 1.83269295 | 4.2245E-08 | 2.4479E-06 |
| Igkv4-74   | 48.8608106 | 119.216005 | 1.3949953  | 4.2169E-08 | 2.4479E-06 |
| Mib2       | 5.1346544  | 14.1981036 | 1.58319683 | 4.2409E-08 | 2.4479E-06 |
| Cog6       | 15.9612547 | 24.0849671 | 0.70686805 | 4.3689E-08 | 2.4985E-06 |
| Ighv9-2    | 28.7142745 | 92.7714972 | 1.80983639 | 4.3613E-08 | 2.4985E-06 |
| Trib3      | 5.85419084 | 21.1884096 | 1.96250387 | 4.4533E-08 | 2.4985E-06 |
| Tspan13    | 77.8001979 | 131.917964 | 0.87743391 | 4.451E-08  | 2.4985E-06 |
| SEI1l      | 74.0349733 | 141.875679 | 1.05635002 | 4.5223E-08 | 2.5171E-06 |
| Slc1a4     | 7.04781183 | 11.4766503 | 0.81518158 | 4.701E-08  | 2.5959E-06 |
| Atp9a      | 1.57194625 | 3.27298766 | 1.16168884 | 4.8779E-08 | 2.6212E-06 |
| Pdxdc1     | 12.350447  | 19.4733908 | 0.77042941 | 4.8824E-08 | 2.6212E-06 |
| SERPINA3g  | 3.58522835 | 8.78025916 | 1.4277383  | 4.8962E-08 | 2.6212E-06 |
| Slc35a2    | 7.31890771 | 11.5176053 | 0.7670044  | 4.8527E-08 | 2.6212E-06 |
| Susd6      | 5.67195617 | 10.4634998 | 0.99234617 | 4.8388E-08 | 2.6212E-06 |
| TmEm123    | 135.814148 | 242.749425 | 0.95188896 | 4.874E-08  | 2.6212E-06 |
| NEo1       | 0.07054629 | 0.62612851 | 3.20581061 | 5.0577E-08 | 2.677E-06  |
| Gabarap    | 91.102466  | 166.819847 | 0.98241311 | 5.1323E-08 | 2.7062E-06 |
| Rab6a      | 29.6031566 | 43.8498005 | 0.67849197 | 5.3167E-08 | 2.793E-06  |
| Prrc1      | 12.8510305 | 20.6633024 | 0.80155072 | 5.4544E-08 | 2.8278E-06 |
| Rnf103     | 3.49859977 | 5.96573581 | 0.88511906 | 5.4837E-08 | 2.8278E-06 |
| RnpEpl1    | 4.81889328 | 7.5543354  | 0.76074068 | 5.4383E-08 | 2.8278E-06 |
| Endod1     | 6.15316971 | 10.1126632 | 0.83226657 | 5.5836E-08 | 2.8582E-06 |
| Praf2      | 5.75380578 | 10.8659631 | 1.02993185 | 5.6876E-08 | 2.8746E-06 |
| Spint2     | 7.34653617 | 12.2139734 | 0.84493543 | 5.7105E-08 | 2.8746E-06 |
| Yif1a      | 21.6809215 | 38.5979021 | 0.94026825 | 5.718E-08  | 2.8746E-06 |
| Lmo4       | 15.1512899 | 24.5464423 | 0.80920763 | 5.7623E-08 | 2.8865E-06 |
| Dnajc1     | 3.60139592 | 5.54067935 | 0.7348424  | 6.2023E-08 | 3.0417E-06 |
| Itpripl2   | 0.12803576 | 0.87919737 | 2.91518289 | 6.247E-08  | 3.0424E-06 |
| Slc39a13   | 4.27827583 | 7.45111603 | 0.91148684 | 6.3512E-08 | 3.0718E-06 |
| Pja2       | 7.85630026 | 13.6083297 | 0.90560669 | 6.4489E-08 | 3.1083E-06 |
| Gm16350    | 23.5919258 | 55.308813  | 1.33667862 | 6.6362E-08 | 3.1745E-06 |
| Prxl2c     | 6.00134439 | 10.7218524 | 0.94727964 | 6.6768E-08 | 3.1745E-06 |
| Ighv5-15   | 25.9141269 | 93.8358001 | 1.95951179 | 6.9233E-08 | 3.2696E-06 |
| Igkv8-21   | 253.683194 | 562.517456 | 1.25460324 | 7.0511E-08 | 3.3107E-06 |
| Il3ra      | 2.82948133 | 7.56597796 | 1.52696051 | 7.0576E-08 | 3.3107E-06 |
| Mthfr      | 5.233514   | 8.95630871 | 0.88638671 | 7.1059E-08 | 3.3112E-06 |

|           |            |            |            |            |            |
|-----------|------------|------------|------------|------------|------------|
| Igkv4-86  | 87.0225436 | 199.965094 | 1.30964676 | 7.1343E-08 | 3.3135E-06 |
| Parp4     | 7.50761629 | 13.5623984 | 0.96836996 | 7.2066E-08 | 3.325E-06  |
| CEbpg     | 12.43347   | 21.0710695 | 0.87044679 | 7.541E-08  | 3.4341E-06 |
| Bckdha    | 9.20843982 | 20.0079007 | 1.22548147 | 7.6162E-08 | 3.4571E-06 |
| DErl1     | 129.802242 | 211.170482 | 0.81522259 | 7.7354E-08 | 3.4774E-06 |
| AU040320  | 8.82820863 | 15.8680335 | 0.96071512 | 7.7704E-08 | 3.4814E-06 |
| Bmf       | 5.67799777 | 13.2170348 | 1.32586415 | 7.7938E-08 | 3.4814E-06 |
| NfE2l1    | 34.552628  | 52.8959632 | 0.7293996  | 8.3007E-08 | 3.6612E-06 |
| Cln8      | 1.85300726 | 3.56768818 | 1.05099426 | 8.3783E-08 | 3.6838E-06 |
| HEatr5a   | 1.83001089 | 3.09829889 | 0.86998659 | 8.7052E-08 | 3.7396E-06 |
| Mcrip1    | 21.7015057 | 41.1268732 | 1.0288351  | 8.7224E-08 | 3.7396E-06 |
| Mknk1     | 15.440431  | 30.7643332 | 1.09712445 | 8.6447E-08 | 3.7396E-06 |
| SErf2     | 14.1600435 | 23.0294803 | 0.8141757  | 8.7451E-08 | 3.7396E-06 |
| Zfp260    | 8.1133273  | 15.370286  | 1.04214298 | 8.68E-08   | 3.7396E-06 |
| SEcisbp2l | 6.25666729 | 10.5971096 | 0.87534107 | 8.8421E-08 | 3.7696E-06 |
| Aig1      | 0.94331833 | 2.25313561 | 1.35118953 | 8.8851E-08 | 3.7717E-06 |
| Igkv5-43  | 770.267051 | 1568.91977 | 1.13458543 | 8.9395E-08 | 3.7717E-06 |
| H6pd      | 6.36635909 | 10.2183714 | 0.79372077 | 9.0285E-08 | 3.7914E-06 |
| Golga2    | 16.4318795 | 27.286247  | 0.84866278 | 9.2083E-08 | 3.8554E-06 |
| Igkv4-58  | 88.4913289 | 188.755464 | 1.19631903 | 9.313E-08  | 3.8876E-06 |
| Gpr155    | 2.52403384 | 4.25907048 | 0.86477407 | 9.7929E-08 | 4.0398E-06 |
| Trib1     | 11.316922  | 21.1980173 | 1.02325024 | 9.9125E-08 | 4.0772E-06 |
| Srgn      | 141.106116 | 248.672381 | 0.92835613 | 1.0119E-07 | 4.1306E-06 |
| Yipf4     | 17.9864186 | 26.87745   | 0.69029546 | 1.0217E-07 | 4.1306E-06 |
| Zfp324    | 4.62140848 | 7.11153232 | 0.73296432 | 1.0151E-07 | 4.1306E-06 |
| BEt1l     | 4.86459743 | 8.43023078 | 0.89663215 | 1.0422E-07 | 4.1723E-06 |
| Prkcz     | 0.73956701 | 1.61513008 | 1.23758219 | 1.0458E-07 | 4.1723E-06 |

241

242

243  
244

**Supplementary Table 3. List of antibodies used in flow cytometry, western blot and immunofluorescence**

| Antibody or Dye                 | Clone    | Host/Isotype       | Supplier                     |
|---------------------------------|----------|--------------------|------------------------------|
| <b>Flow cytometry</b>           |          |                    |                              |
| Anti-CD138                      | 281-2    | Rat IgG2a, κ       | BD Biosciences               |
| Anti-CD45R/B220                 | RA3-6B2  | Rat / IgG2a, kappa | BD Biosciences               |
| Anti-CD19                       | 1D3      | Rat IgG2a, κ       | BD Biosciences               |
| Anti-CD21/35                    | 7G6      | Rat gG2b, κ        | BD Biosciences               |
| Anti-CD23                       | B3B4     | Rat IgG2a, κ       | BD Biosciences               |
| Anti-CD93                       | AA4.1    | Rat IgG2a, κ       | BD Biosciences               |
| Anti-IgM                        | II/41    | Rat IgG2a, κ       | eBioscience                  |
| Anti-Taci                       | 8F10-3   | Rat IgG2a, κ       | eBioscience                  |
| V450-anti-cleaved caspase-3     |          |                    | BD Biosciences               |
| Anti-KI67 Alexa fluor 700       | B56      | mouse IgG1         | BD Biosciences               |
| Dapi                            |          |                    |                              |
| ER-Tracker Blue-White DPX       |          |                    | Invitrogen                   |
| MitoTracker Green FM            |          |                    | Invitrogen                   |
| MitoTracker Orange MTMRos       |          |                    | Invitrogen                   |
| Viability dye e506              |          |                    | Invitrogen                   |
| Aqua zombie                     |          |                    | Biologend                    |
| <b>Immunofluorescence</b>       |          |                    |                              |
| Anti-Calnexin                   |          | Rabbit IgG         | Abcam                        |
| Anti-cytochrome c               |          | Rabbit IgG         | Thermofisher                 |
| Anti-Rabbit IgG Alexa fluor 555 |          | Goat IgG           | Thermofisher                 |
| Anti-mouse IgM Alexa fluor 647  |          | Goat IgG           | Thermofisher                 |
| Anti-mouse Irf4 Alexa fluor 488 | IRF4.3E4 | Rat IgG1           | Biologend                    |
| Hoescht33342                    |          |                    | Thermofisher                 |
| <b>Western blot</b>             |          |                    |                              |
| Anti-sec22b                     |          | Rabbit IgG         | Synaptic Systems             |
| Anti-b actin                    |          | Rabbit IgG         | Cell signaling               |
| Anti-Xbp1                       |          | Rabbit IgG         | Cell Signaling               |
| Anti-IgM                        |          | Goat IgG           | Southern Biotech             |
| Anti-CD138                      |          | Rabbit IgG         | Poteintech                   |
| Anti-Scfd1/rsly1                |          | Rabbit IgG         | Dr Jesse Hay, PMID: 14565970 |
| Anti-Usol/p115                  |          | Rabbit IgG         | Dr Jesse Hay, PMID: 25406594 |
| Anti-Stx5                       |          | Rabbit IgG         | Synaptic Systems             |
| Anti-Ykt6                       |          | Rabbit IgG         | Dr Jesse Hay; PMID: 12589064 |
| Anti- Rabbit HRP                |          | Goat IgG           | Jackson immuno research      |

|                         |  |          |                  |
|-------------------------|--|----------|------------------|
|                         |  |          |                  |
| <b>ELISA</b>            |  |          |                  |
| Anti mouse Ig kappa HRP |  | Goat IgG | Southern Biotech |
| Anti mouse IgM HRP      |  | Goat IgG | Southern Biotech |
| Anti mouse IgG1 HRP     |  | Goat IgG | Southern Biotech |
| Anti mouse IgA HRP      |  | Goat IgG | Southern Biotech |
| Anti mouse IgG3 HRP     |  | Goat IgG | Southern Biotech |
|                         |  |          |                  |
|                         |  |          |                  |
|                         |  |          |                  |
|                         |  |          |                  |

245

246

247 **Supplementary Table 4: List of primers used for Biomark based qPCR**

|                      | <b>Gene</b>    | <b>Reference/ Primers</b> |
|----------------------|----------------|---------------------------|
| <b>Taqman assays</b> | <i>Gapdh</i>   | Mm99999915_g1             |
|                      | <i>Actb</i>    | Mm01205647_g1             |
|                      | <i>Prdm1</i>   | Mm00476128_m1             |
|                      | <i>Xbp1</i>    | Mm00457357_m1             |
|                      | <i>Irf4</i>    | Mm00516431_m1             |
|                      | <i>Pax5</i>    | Mm00435501_m1             |
|                      | <i>Cd3e</i>    | Mm00599684_g1             |
|                      | <i>Bach2</i>   | Mm00464379_m1             |
|                      | <i>Cd93</i>    | Mm00440239_g1             |
|                      | <i>Hspa5</i>   | Mm00517691_m1             |
|                      | <i>Edem2</i>   | Mm00467468_m1             |
|                      | <i>Dnajb9</i>  | Mm01622956_s1             |
|                      | <i>Atg5</i>    | Mm01187303_m1             |
|                      | <i>Traf2</i>   | Mm00801978_m1             |
|                      | <i>Atg12</i>   | Mm00503201_m1             |
|                      | <i>Atg16L1</i> | Mm00513085_m1             |
|                      | <i>Ddit3</i>   | Mm01135937_g1             |
|                      | <i>Becn1</i>   | Mm01265461_m1             |
|                      | <i>Herpud1</i> | Mm01249592_m1             |
|                      | <i>Edem1</i>   | Mm00551797_m1             |
| <i>Tnfrsf13b</i>     | Mm03047441_m1  |                           |

248

249

250 **References**

- 251 1. J. R. Wiśniewski, A. Zougman, N. Nagaraj, M. Mann, Universal sample preparation method for  
 252 proteome analysis. *Nat Methods* **6**, 359–362 (2009).
- 253 2. J. Cox, M. Mann, MaxQuant enables high peptide identification rates, individualized p.p.b.-range  
 254 mass accuracies and proteome-wide protein quantification. *Nat Biotechnol* **26**, 1367–1372 (2008).
- 255 3. S. Tyanova, *et al.*, The Perseus computational platform for comprehensive analysis of  
 256 (prote)omics data. *Nat Methods* **13**, 731–740 (2016).

257
